# Supplementary material for: Levosimendan and postoperative NT-proBNP release in noncardiac surgery – a prospective, randomized, double-blinded, phase III trial
Source: Research Square preprint supplement (doi:10.21203/rs.3.rs-5507267/v1), 2024-12-12
Supplement: Supplementary file 1 [file 0ab3a8895c59748a4871ad71.docx]

**Supplementary Online Content**

**Appendix A:** Members of the IMPROVE Investigator Group

**Appendix B:** Inclusion and Exclusion Criteria

**Appendix C:** Definitions of surgery

**Appendix D:** Definitions of perioperative complications

**eTable 1:** Intraoperative blood gas analysis

**eTable 2:** Descriptive statistics of NT-proBNP and Troponin T

**eTable 3:** Regression models for NT-proBNP

**eTable 4:** Differences in the time course of NT-proBNP

**eTable 5:** Logistic regression model of MINS

**eTable 6:** Regression models for maximum Troponin

**eTable 7:** Differences in the time course of Troponin T

**eTable 8:** Logistic regression model of the cardiovascular composite outcome

**eTable 9:** Other Complications & Side effects

This supplementary material has been provided by the authors to give readers additional information about their work.

**Appendix A:** Members of the IMPROVE Investigator Group

Christian Reiterer, PhD, Prof.1

Barbara Kabon, Prof.1

Edith Fleischmann, Prof.1

Alexander Taschner, MD1

Alexandra Graf, Prof.2

Nikolas Adamowitsch, MD1

Katharina Horvath, MD1

David Emler, MD1

Oliver Zotti, MS1

Nicole Hantakova, MD1

Beatrix Hochreiter, BSc.3

Nikolas Adamowitsch, MD1

Melanie Fraunschiel, MSc3

Theresa Clement, MSc4

Simon Schallmeiner, MS1

Moritz Morgenroth, MS1

Viktor Xu, MS1

Tobias Marr, MS1

Georg Vitousek, MS1

1 Department of Anesthesia, Intensive Care Medicine and Pain Medicine, Medical University of Vienna, 1090 Vienna, Austria

2 Institute of Medical Statistics, Center for Medical Data Science, Medical University of Vienna, 1090 Vienna, Austria

3 IT Systems and Communications, Medical University of Vienna, 1090 Vienna, Austria

4 Division Nursing Science with focus on Person-centred Care Research, Karl Landsteiner University of Health Sciences, Krems, Austria

**Appendix B:** Inclusion and Exclusion Criteria

- Eligibility: 45 years of age or older AND undergoing elective moderate- to high risk noncardiac surgery under general anesthesia.
- **Eligibility**

All patients need to meet all of the following criteria for inclusion (1-4):

1. Major surgery (as defined in appendix VII) planned for more than 2 hours

2. ≥ 65 years of age and ≤ 85 years of age

3. Provide written informed consent AND

4. Fulfill ≥ 2 of the following criteria (A-E)

**Inclusion Criteria (A – E)**

1. NT-proBNP ≥ 200 ng/L
2. History of coronary artery disease defined as 1 of the following 7 criteria (I to VII):
3. History of angina
4. History of myocardial infarction or acute coronary syndrome
5. History of a segmental cardiac wall motion abnormality on echocardiography/radionuclide imaging
6. History of positive myocardial stress test (echocardiographic or radionuclide)
7. History of a coronary artery stenosis > 50%
8. ECG with pathological Q waves in any two contiguous leads
9. History of previous artery revascularizations
10. History of permanent/paroxysmal atrial fibrillation diagnosed by physician/specialist
11. History of peripheral arterial disease as defined by a physician/specialist diagnosis of a current, or prior history of any 1 of the following 5criteria (I-V)
12. Intermittent claudication
13. Stenosis ≥ 70 % detected by angiography or doppler
14. Stenosis ≤ 70% detected by angiography or doppler AND requiring medical treatment e.g. ASA or other platelet inhibitor
15. History of stroke or TIA – diagnosed by physician or CT/MRI
16. Diagnosed cerebral arteriovascular disease (cAVK) diagnosed by a physician/specialist
17. Any 3 of 10 of the following risk criteria (i – x).
    - 1. History of congestive heart failure defined as a physician diagnosis of a current or prior episode of congestive heart failure OR prior radiographic evidence of vascular redistribution, interstitial pulmonary oedema, or frank alveolar pulmonary oedema;
      2. History of a transient ischemic attack;
      3. Diabetes and currently taking an oral hypoglycemic agent or insulin;
      4. History of hypertension;
      5. Hyperlipidemia and currently taking a lipid-lowering agent;
      6. Documented chronic kidney disease diagnosed by physician/specialist and creatinine clearance > 30 ml/min
      7. History of smoking within 2 years of surgery
      8. Diastolic dysfunction (≥ grade 1) documented by echocardiography
      9. Age ≥ 70 years
      10. Preoperative Troponin T (5th generation) ≥ 25ng/dL

**Exclusion Criteria**

1. Previous adverse response and/or allergy to levosimendan
2. ICU Patients undergoing surgery
3. Preoperative Sepsis/SIRS needing ICU treatment
4. Preoperative hemodynamically instable patients, who require vasopressor or inotropic support
5. Renal or liver transplantation
6. History of severe heart failure (e.g. LVEF < 30%)
7. Patients undergoing surgery for pheochromocytoma
8. Liver cirrhosis
9. Pulmonary Hypertension (mPAP > 25 mmHg)
10. Severe Renal Failure defines as creatinine clearance < 30 ml/min

**Appendix C:** Definitions of surgery

***Major general surgery*** – A patient undergoing one or more of the following general surgeries: complex visceral resection, partial or total colectomy or stomach surgery, other intra-abdominal surgery, major hepato-biliary surgery, pancreatic surgery.

***Major urology or gynecology surgery*** – A patient undergoing one or more of the following major urology or gynecology surgeries: nephrectomy, urethrectomy, bladder resection, retroperitoneal tumor resection, exenteration, cytoreduction surgery, hysterectomy, or radical prostatectomy

**Appendix D:** Definitions of perioperative complications

**Heart failure requiring medical intervention**

New onset of acute heart failure requiring medical intervention with one or more of the following drugs: dobutamine, dopamine, epinephrine, milrinone. Furthermore, also treatment with a venous-arterial extracorporeal membrane oxygenation device (ECMO).

**Myocardial infarction**

The fourth universal definition of myocardial infarction 201837 will be used to define MI as follows:

MI is an acute myocardial injury with clinical evidence of acute myocardial ischemia and with detection of a rise and / or fall of cTnT values with at least one value above the 99th percentile upper reference limit (URL) and at least one of the following:

1. Symptoms of myocardial ischemia;(new ischemic ECG changes; (new or presumed ECG changes indicative of ischemia (i.e., ST segment elevation [≥ 2 mm in leads V1, V2, or V3 OR ≥ 1 mm in the other leads], ST segment depression [≥ 1 mm], or symmetric inversion of T waves ≥ 1 mm) in at least two contiguous leads; new LBBB)
2. Development of pathological Q waves;
3. Imaging evidence of new loss of viable myocardium or new regional wall motion abnormality in pattern consistent with an ischemic etiology.
4. Identification of a coronary thrombus by angiography or autopsy

**Life threating bleeding**

Life-threatening bleeding is bleeding that is fatal or leads to: significant hypotension that requires inotrope therapy, urgent (within 24 hours) surgery (other than superficial vascular repair), or intracranial hemorrhage.

**New onset of atrial fibrillation**

Atrial Fibrillation will be diagnosed according to the management guidelines for atrial fibrillation published by the European Society for Cardiology (ESC).38

AF requires a rhythm documentation using an ECG showing the typical pattern of AF: Absolutely irregular RR intervals and no discernible, distinct P waves. Duration of the episode should at least be 30 seconds.

**Sepsis**

Presence of two or more of the following findings: body temperature < 38°C or > 38°C, heart rate > 90 beats per minute respiratory rate > 20 breath per minute, or, PaCO2 < 32 mmHg; WBC count < 4,000 cells/mm3 or > 12,000 cells/mm3 or > 10% band forms *PLUS*

a confirmed infectious process; infection can be suspected or proven (positive culture, stain, or polymerase chain reaction), a clinical syndrome pathognomonic for infection, such as abnormal chest x-rays consistent with pneumonia, petechiae, purpura, or purpura fulminans; OR

development of organ failure requiring e.g. renal replacement therapy, respiratory failure needing invasive support, refractory hypotension requiring significant vasopressor support, every kind of extracorporeal membrane oxygenation device.

**Stroke / TIA**

Stroke is defined as a new focal neurological deficit thought to be vascular in origin with signs or symptoms lasting more than 24 hours or leading to death. Stroke will be sub-classified into hemorrhagic and non-haemorrhagic stroke. Classification is based on the tests ordered by the attending neurologists/physician. CT or MRI will also be used for outcome classification.

**Pulmonary embolism**

To diagnose symptomatic PE any of the following symptoms are required:

- - 1. High probability ventilation/perfusion lung scan
    2. Intraluminal filling defect of segmental or larger artery on the spiral CT scan,
    3. Intraluminal filling defect on pulmonary angiography
    4. Positive test for DVT

Diagnosis will be done by the attending physician. Test results will be used for outcome classification.

**Unplanned ICU admission**

Defined as admission on ICU at least 24 hours after surgery due to hemodynamic, respiratory, cardiovascular or septic events.

**Death**

Death is defined as any with vascular cause or cardiac cause, including myocardial infarction, cardiac arrest, stroke, fatal pulmonary embolus, hemorrhage and multi-organ failure.

**eTable 1:** Intraoperative blood gas analysis

| **Variable, mean (SD)** | **Levosimendan**  **(n=115)** | **Placebo**  **(n=113)** | **p-Value** |
| --- | --- | --- | --- |
| pH | 7.37 (0.1) | 7.36 (0.1) | 0.412 |
| pCO2, *mmHg* | 43 (4) | 42 (5) | 0.417 |
| pO2, *mmHg* | 168 (45) | 177 (59) | 0.226 |
| Bicarbonate, *mmol.L-1* | 23 (2) | 24 (6) | 0.246 |
| Hemoglobin, *g.dL-1* | 11.4 (1.9) | 11.4 (1.5) | 0.993 |
| Sodium, *mmol.L-1* | 139 (4) | 139 (5) | 0.911 |
| Potassium, *mmol.L-1* | 4.1 (0.4) | 4.1 (0.3) | 0.75 |
| Calcium, *mmol.L-1* | 1.23 (0.1) | 1.22 (0.1) | 0.64 |
| Chloride, *mmol.L-1* | 108 (5) | 108 (3) | 0.392 |
| Glucose, *mg.dL-1* | 154 (30) | 137 (32) | <0.001 |
| Lactate, *mmol.L-1* | 1.0 (0.4) | 1.0 (0.6) | 0.441 |

**eTable 1:** Summary characteristics are presented as means and standard deviations. All p-values are for t-test.

| **Timepoint** | **Group** | **Mean** | **SD** | **Median** | **IQR** | **N** |
| --- | --- | --- | --- | --- | --- | --- |
| **NT-proBNP, pg.mL-1** | |  |  |  |  |  |
| **Baseline** | Levosimendan | 584 | 799 | 294 | 168 – 717 | 115 |
|  | Placebo | 594 | 847 | 363 | 155 – 685 | 112 |
| **2 hours after surgery** | Levosimendan | 576 | 789 | 313 | 177 – 743 | 115 |
|  | Placebo | 587 | 816 | 380 | 155 – 646 | 112 |
| **POD 1** | Levosimendan | 1054 | 1029 | 741 | 382 – 1308 | 112 |
|  | Placebo | 954 | 1015 | 562 | 356 – 1214 | 111 |
| **POD 2** | Levosimendan | 1412 | 1740 | 986 | 521 – 1752 | 114 |
|  | Placebo | 1271 | 1479 | 887 | 413 – 1365 | 109 |
| **POD 3** | Levosimendan | 1378 | 1213 | 1055 | 515 – 1920 | 105 |
|  | Placebo | 2055 | 2994 | 1115 | 638 – 1804 | 107 |
| **POD 5** | Levosimendan | 1374 | 1277 | 949 | 453 – 1676 | 96 |
|  | Placebo | 2647 | 5022 | 1183 | 477 – 2393 | 96 |
| **Maximum** | Levosimendan | 1778 | 1884 | 1270 | 703 – 2362 | 115 |
|  | Placebo | 2121 | 2895 | 1304 | 676 – 2040 | 113 |
|  |  |  |  |  |  |  |
| **Troponin T, ng.L-1** | |  |  |  |  |  |
| **Baseline** | Levosimendan | 24 | 29 | 16 | 12 – 26 | 114 |
|  | Placebo | 20 | 12 | 16 | 11 – 23 | 111 |
| **2 hours after surgery** | Levosimendan | 23 | 24 | 16 | 11 – 24 | 115 |
|  | Placebo | 18 | 11 | 15 | 10 – 24 | 109 |
| **POD 1** | Levosimendan | 38 | 56 | 23 | 17 – 36 | 111 |
|  | Placebo | 27 | 24 | 21 | 14 – 31 | 111 |
| **POD 2** | Levosimendan | 35 | 39 | 23 | 15 – 36 | 112 |
|  | Placebo | 31 | 51 | 20 | 14 – 30 | 109 |
| **POD 3** | Levosimendan | 33 | 36 | 22 | 14 – 32 | 105 |
|  | Placebo | 29 | 44 | 18 | 13 – 27 | 107 |
| **POD 5** | Levosimendan | 33 | 31 | 23 | 16 – 32 | 97 |
|  | Placebo | 33 | 63 | 20 | 13 – 28 | 97 |
| **Maximum** | Levosimendan | 45 | 61 | 26 | 19 – 43 | 113 |
|  | Placebo | 37 | 55 | 24 | 17 – 35 | 115 |

**eTable 2:** Descriptive statistics of NT-proBNP and Troponin T

**eTable 2:** Summary characteristics are presented as means and standard deviations.

| **eTable 3:** Regression models for NT-proBNP | | | |
| --- | --- | --- | --- |
| **Median regression model** | | | |
| *Variable* | *Estimate* | *95% CI* | *p-value* |
| Treatment | -82.99 | (-321.08 – 190.96) | 0.480 |
| Age | -3.17 | (-38.7 – 21.68) | 0.853 |
| Sex: female *vs.* male | -262.74 | (-630.14 - 94.05) | 0.164 |
| BL NT-proBNP | 1.75 | (1.09 - 2.39) | <0.001 |
| BL Troponin T | 3.17 | (-0.45 - 25.98) | 0.686 |
| BMI | -28.91 | (-53.31 - 1.34) | 0.046 |
| CAD: Yes *vs* No | 76.88 | (-148.38 - 421.98) | 0.593 |
| PAD: Yes *vs* No | 66.58 | (-435.48 - 339.88) | 0.723 |
| CVD: Yes *vs* No | 75.6 | (-185.23 - 538.55) | 0.688 |
| AF: Yes *vs* No | -34.24 | (-248.31 - 394.93) | 0.844 |
| Nephrectomy: Yes *vs* No | 312.74 | (-248.31 - 394.93) | 0.196 |

**eTable 2:** The regression coefficients (column estimate) and confidence intervals were estimated using median regression models. The corresponding p-values are presented. BL, baseline; BMI, body mass index; CAD, coronary artery disease; PAD, peripheral artery disease; CVD, cerebrovascular disease; AF, atrial fibrillation

**eTable 4:** Differences in the time course of NT-proBNP

| **Median regression model** | | | |
| --- | --- | --- | --- |
| *Variable* | *Estimate* | *95% CI* | *p-value* |
| **Interaction term treatment*visit: values are given for Levosimendan vs. Placebo** | | | |
| 2 hours vs BL | 26.84 | (-48.01 – 101.68) | 0.475 |
| POD 1 vs BL | 145.3 | (-80.52 – 372.12) | 0.202 |
| POD 2 vs BL | 131.22 | (-269.98 – 532.42) | 0.514 |
| POD 3 vs BL | -691.03 | (-1198.45 – -183.61) | 0.009 |
| POD 5 vs BL | -1312.86 | (-2106.18 – -519.54) | 0.002 |
| **Potential confounder included into the model** | | | |
| Age | 27.83 | (-0.33 – 1.38) | 0.208 |
| Sex: female *vs.* male | -189.79 | (-18.07 – 8.27) | 0.271 |
| BL NT-proBNP | 9.28 | (0.01 – 0.01) | 0.187 |
| BMI | -10.09 | (0.05 – 1.47) | 0.46 |
| CAD: Yes *vs* No | 177.75 | (-6.07 – 11.56) | 0.285 |
| PAD: Yes *vs* No | 115.23 | (-10.27 – 7.39) | 0.587 |
| CVD: Yes *vs* No | 8.56 | (-10.82 – 5.78) | 0.964 |
| AF: Yes *vs* No | 548.03 | (-18.68 – -0.31) | 0.001 |
| Nephrectomy: Yes *vs* No | 219.26 | (-215.96 -654.47) | 0.316 |

**eTable 3:** The regression coefficients (column estimate) and confidence intervals were estimated using median regression models. The corresponding p-values are presented. POD, postoperative day; BL, baseline; BMI, body mass index; CAD, coronary artery disease; PAD, peripheral artery disease; CVD, cerebrovascular disease; AF, atrial fibrillation

**eTable 5:** Logistic regression model of MINS

|  | Logistic Regression Model | | |
| --- | --- | --- | --- |
| **Variable** | **Odds Ratio** | **95% CI** | **p-Value** |
| Treatment | 1.833 | (1.001 – 3.395) | 0.051 |
| Age | 1.071 | (1.002 – 1.147) | 0.047 |
| Sex: male vs. female | 0.82 | (0.376 – 1.768) | 0.613 |
| BL NT-proBNP | 1 | (1 – 1.001) | 0.445 |
| BL Troponin T | 1.105 | (1.06 – 1.16) | <0.001 |
| BMI | 1.047 | (0.979 – 1.123) | 0.183 |
| CAD: Yes vs. No | 0.853 | (0.433 – 1.675) | 0.643 |
| PAD: Yes vs. No | 0.857 | (0.357 – 2.055) | 0.728 |
| CVD: Yes vs. No | 0.876 | (0.424 – 1.806) | 0.72 |
| AF: Yes vs. No | 0.75 | (0.369 – 1.509) | 0.422 |

**eTable 4:** The odds ratios and 95% confidence intervals were estimated using a logistic regression model. The corresponding p-values are presented. BL, baseline; BMI, body mass index; CAD, coronary artery disease; PAD, peripheral artery disease; CVD, cerebrovascular disease; AF, atrial fibrillation

**eTable 6:** Regression models for maximum Troponin

**eTable 5:** The regression coefficients (column estimate) and confidence intervals were estimated using median regression models. The corresponding p-values are presented. BL, baseline; BMI, body mass index; CAD, coronary artery disease; PAD, peripheral artery disease; CVD, cerebrovascular disease; AF, atrial fibrillation

|  | **Median regression model** | | | | | |
| --- | --- | --- | --- | --- | --- | --- |
| *Variable* | *Estimate* | | *95% CI* | | *p-value* | | |
| Treatment | 0.45 | | (-1.66 – 3.41) | | 0.728 | | |
| Age | 0.25 | | (-0.16 – 0.55) | | 0.142 | | |
| Sex: female *vs.* male | -1.09 | | (-7.18 – 1.09) | | 0.659 | | |
| BL NT-proBNP | 0 | | (0 – 0) | | 0.616 | | |
| BL Troponin T | 0.9 | | (0.64 – 1.21) | | <0.001 | | |
| BMI | 0.1 | | (-0.16 – 1.21) | | 0.51 | | |
| CAD: Yes *vs* No | -0.56 | (-3.32 – 1.66) | | 0.659 | |
| PAD: Yes *vs* No | -0.44 | (-3.57 – 2.48) | | 0.786 | |
| CVD: Yes *vs* No | -0.51 | (-2.56 – 3.67) | | 0.729 | |
| AF: Yes *vs* No | -1.07 | (-4.43 – 1.7) | | 0.474 | |

**eTable 7:** Differences in the time course of Troponin T

| **Median regression model** | | | |
| --- | --- | --- | --- |
| *Variable* | *Estimate* | *95% CI* | *p-value* |
| **Interaction term treatment*visit: values are given for Levosimendan vs. Placebo** | | | |
| 2 hours vs BL | -0.01 | (-2.69 – 2.67) | 0.995 |
| POD 1 vs BL | 6.53 | (-6.01 – 19.07) | 0.3 |
| POD 2 vs BL | -1.07 | (-13.11 – 10.97) | 0.859 |
| POD 3 vs BL | 0.07 | (-12.37 – 12.5) | 0.992 |
| POD 5 vs BL | -4.82 | (-17.54 – 7.9) | 0.45 |
| **Potential confounder included into the model** | | | |
| Age | 0.53 | (-0.33 – 1.38) | 0.221 |
| Sex: female *vs.* male | -4.9 | (-18.07 – 8.27) | 0.458 |
| BL NT-proBNP | 0.01 | (0.01 – 0.01) | <0.001 |
| BMI | 0.76 | (0.05 – 1.47) | 0.035 |
| CAD: Yes *vs* No | 2.74 | (-6.07 – 11.56) | 0.534 |
| PAD: Yes *vs* No | -1.44 | (-10.27 – 7.39) | 0.745 |
| CVD: Yes *vs* No | -2.52 | (-10.82 – 5.78) | 0.544 |
| AF: Yes *vs* No | -9.5 | (-18.68 – -0.31) | 0.043 |

**eTable 6:** The regression coefficients (column estimate) and confidence intervals were estimated using median regression models. The corresponding p-values are presented. POD, postoperative day; BL, baseline; BMI, body mass index; CAD, coronary artery disease; PAD, peripheral artery disease; CVD, cerebrovascular disease; AF, atrial fibrillation

**eTable 8:** Logistic regression model of the cardiovascular composite outcome

|  | Logistic Regression Model | | |
| --- | --- | --- | --- |
| **Variable** | **Odds Ratio** | **95% CI** | **p-Value** |
| Treatment | 0.451 | (0.18 – 1.069) | 0.077 |
| Age | 0.974 | (0.885 – 1.071) | 0.582 |
| Sex: male vs. female | 0.349 | (0.139 – 0.888) | 0.025 |
| BL NT-proBNP | 1 | (1 – 1.001) | 0.533 |
| BL Troponin T | 1.001 | (0.969 – 1.019) | 0.919 |
| BMI | 0.99 | (0.901 – 1.085) | 0.831 |
| CAD: Yes vs. No | 0.43 | (0.146 – 1.131) | 0.101 |
| PAD: Yes vs. No | 1.725 | (0.512 – 5.087) | 0.343 |
| CVD: Yes vs. No | 0.638 | (0.196 – 1.759) | 0.414 |
| AF: Yes vs. No | 0.792 | (0.286 – 2.055) | 0.639 |
| MINS 3d: Yes vs. No | 1.735 | (0.691 – 4.613) | 0.251 |

**eTable 7:** The odds ratios and 95% confidence intervals were estimated using a logistic regression model. The corresponding p-values are presented. BL, baseline; BMI, body mass index; CAD, coronary artery disease; PAD, peripheral artery disease; CVD, cerebrovascular disease; AF, atrial fibrillation; MINS, myocardial injury after noncardiac surgery

**eTable 9:** Other Complications & Side effects

| **Variable, no (%)** | **Levosimendan**  **(n=115)** | | **Placebo**  **(n=113)** | |
| --- | --- | --- | --- | --- |
| **Other Complications (within 30 days)** |  | |  | |
| Bleeding | 0 (0) | | 4 | |
| Sepsis | 4 (3.5) | | 3 (2.7) | |
| Hospital Readmission | 11 (9.8) | | 10 (9.0) | |
| Re-Surgery | 1 (0.9) | | 4 (3.6) | |
| **Side effects (within first 3 postoperative days)** | |  | |  | |
| Pressure or tightness in the chest | | 10 (8.7) | | 5 (4.4) | |
| Pain in the chest, back, jaw | | 6 (5.2) | | 4 (3.5) | |
| Shortness of breath | | 30 (26.1) | | 29 (25.7) | |
| Sweating | | 25 (21.7) | | 38 (33.6) | |
| Nausea | | 46 (40) | | 43 (38.1) | |
| Vomiting | | 19 (16.5) | | 20 (17.7) | |
| Anxiety | | 1.0 (0.9) | | 1.0 (0.9) | |
| Cough | | 24 (20.9) | | 26 (23.0) | |
| Signs of ST segment elevation/deviation | | 13 (11.3) | | 11 (9.7) | |

**eTable 9:** Summary characteristics are presented as number and percentage. All p-values are for a chi-square test or fisher exact test, respectively.
