# Supplementary material for: Levosimendan and postoperative NT-proBNP release in noncardiac surgery – a prospective, randomized, double-blinded, phase III trial
Source: Research Square preprint supplement (doi:10.21203/rs.3.rs-5507267/v1), 2024-12-12
Supplement: Supplementary file 2 [file 87e0a02d293b6633e5e9691a.docx]

The effect of perioperative Levos**IM**endan administration on **P**ostoperative N-terminal p**R**o Brain Natriuretic Peptide concentration in patients with increased cardi**OV**ascular risk factors undergoing noncardiac surg**E**ry –

A double-blinded randomized clinical trial


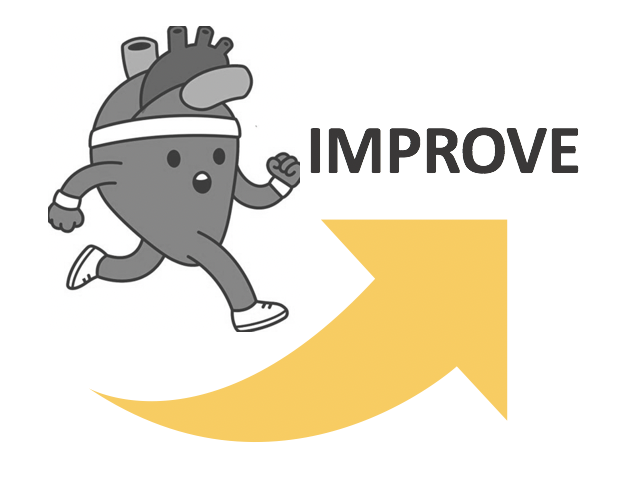


**IMPROVE_2.3**

**EudraCT: 2019-004464-22**

Christian Reiterer1, MD

Markus Falkner von Sonnenburg1, MD

Lukas Baumann, Bsc. Bsc.2

Barbara Kabon1, MD

Edith Fleischmann1, MD

1 Department of Anesthesia, Intensive Care Medicine and Pain Medicine, Medical University of Vienna

2 Center for Medical Statistics, Informatics and Intelligent Systems, Medical University of Vienna

This protocol has been developed by Dr. Reiterer and the content is his intellectual property. It is an offence to reproduce or use the information and data in this protocol for any purpose other than the IMPROVE-Trial without prior approval from Dr. Reiterer.

Table of Content

[1 Abbreviations 6](#_Toc96924940)

[2 Clinical Trial Summary 8](#_Toc96924941)

[3 Responsibilities Medical University of Vienna 12](#_Toc96924942)

[4 Responsibilities Charité - Universitätsmedizin Berlin 13](#_Toc96924943)

[5 Abstract 14](#_Toc96924944)

[6 Zusammenfassung 15](#_Toc96924945)

[7 Background 16](#_Toc96924946)

[7.1 Introduction 16](#_Toc96924947)

[7.2 Levosimendan 16](#_Toc96924948)

[7.2.1 Clinical evidence regarding safety of Levosimendan 16](#_Toc96924949)

[7.2.2 Biomarkers 17](#_Toc96924950)

[8 Plan of Investigation 18](#_Toc96924951)

[8.1 Trial Design 18](#_Toc96924952)

[8.2 Primary Outcome 18](#_Toc96924953)

[8.3 Secondary Outcomes 18](#_Toc96924954)

[8.3.1 Aim 1 18](#_Toc96924955)

[8.3.2 Aim 2 18](#_Toc96924956)

[8.3.3 Aim 3 18](#_Toc96924957)

[8.3.4 Aim 4 19](#_Toc96924958)

[8.4 Exploratory Outcome 19](#_Toc96924959)

[9 Material and Methods 20](#_Toc96924960)

[9.1 Eligibility 20](#_Toc96924961)

[9.1.1 Inclusion Criteria (A – E) 20](#_Toc96924962)

[9.2 Exclusion Criteria 21](#_Toc96924963)

[9.3 Patient Recruitment and Informed Consent 21](#_Toc96924964)

[9.4 Randomization 21](#_Toc96924965)

[9.5 Anonymization 21](#_Toc96924966)

[9.6 Trial Interventions 22](#_Toc96924967)

[9.7 Study Drug Preparation 22](#_Toc96924968)

[9.7.1 Placebo 23](#_Toc96924969)

[9.7.2 Packaging 23](#_Toc96924970)

[9.7.3 Labeling 23](#_Toc96924971)

[9.7.4 Preparation and Handling 23](#_Toc96924972)

[9.8 Anesthesia protocol 23](#_Toc96924973)

[9.8.1 Blood Pressure Management 24](#_Toc96924974)

[9.9 Follow-Up 26](#_Toc96924975)

[9.10 Perioperative Patient Management 26](#_Toc96924976)

[10 Measurements 27](#_Toc96924977)

[10.1 Demographic and Morphometric Data 27](#_Toc96924978)

[10.2 Laboratory Measurements 27](#_Toc96924979)

[10.2.1 Cardiac Biomarker 27](#_Toc96924980)

[10.3 Records of Routine Data 27](#_Toc96924981)

[10.3.1 Intra/postoperative Data 27](#_Toc96924982)

[10.3.2 Laboratory Measurements 27](#_Toc96924983)

[10.4 Follow Up 27](#_Toc96924984)

[10.5 Data Analysis and Sample Size 28](#_Toc96924985)

[10.5.1 Primary Endpoint and Hypothesis 28](#_Toc96924986)

[10.5.2 Statistical Analysis 28](#_Toc96924987)

[10.5.3 Sample Size Considerations 28](#_Toc96924988)

[11 Risk/benefit assessment 30](#_Toc96924989)

[11.1 Risk 30](#_Toc96924990)

[11.2 Benefit 30](#_Toc96924991)

[11.3 Patient privacy 31](#_Toc96924992)

[11.4 Recruitment and Informed Consent 31](#_Toc96924993)

[11.5 Gender Aspects 31](#_Toc96924994)

[12 Reporting Events 32](#_Toc96924995)

[12.1.1 Adverse (Drug) Reaction (ADR) 32](#_Toc96924996)

[12.1.2 Suspected Unexpected Serious Adverse Reactions (SUSAR) 32](#_Toc96924997)

[12.1.3 Serious Adverse Events (SAE) 32](#_Toc96924998)

[12.2 Pregnancy 33](#_Toc96924999)

[12.3 Data and Safety Monitoring Board 33](#_Toc96925000)

[12.4 Emergency Unblinding and Termination of the Study Drug 33](#_Toc96925001)

[12.5 Termination of the study 33](#_Toc96925002)

[12.6 Adjudication of Trial Outcomes 33](#_Toc96925003)

[12.7 Data Monitoring 33](#_Toc96925004)

[12.8 Direct access to source data/documents 34](#_Toc96925005)

[12.9 Other Management at the discretion of the attending physician 34](#_Toc96925006)

[13 Ethical and Legal Aspects 35](#_Toc96925007)

[13.1 Informed consent subjects 35](#_Toc96925008)

[13.2 Ethical and good clinical practice (GCP) 35](#_Toc96925009)

[13.3 Acknowledgement / approval of the study 35](#_Toc96925010)

[13.4 Data Management and Safety 35](#_Toc96925011)

[13.5 Quality assurance 36](#_Toc96925012)

[13.6 Dissemination policy 36](#_Toc96925013)

[13.7 Insurance 36](#_Toc96925014)

[13.8 Financing 36](#_Toc96925015)

[13.9 Substudies 36](#_Toc96925016)

[14 References 37](#_Toc96925017)

[15 APPENDIX 42](#_Toc96925018)

[15.1 Appendix I: Definition of Perioperative Complications 42](#_Toc96925019)

[15.2 Appendix II: Sub-study I: Body Composition Monitor 44](#_Toc96925029)

[15.3 Appendix III: Sub-study II: Renal Function 46](#_Toc96925035)

[15.4 Appendix IV: Sub-study III: Inflammatory Response 48](#_Toc96925039)

[15.5 Appendix IV: Time Schedule 50](#_Toc96925044)

[15.6 Appendix V: Study specific laboratory measurements 51](#_Toc96925045)

[15.7 Appendix VI: WHODAS 2.0 52](#_Toc96925046)

[15.8 Appendix VII: Definitions of surgeries 53](#_Toc96925047)

[15.9 Appendix VII: IMPROVE Trial - Incidence of neurocognitive decline 54](#_Toc96925048)

# Abbreviations

AE Adverse event

AKI Acute kidney injury

ASA American Society of Anesthesiologist physical status

BCM Body Composition Monitor

BNP brain natriuretic peptide

CHF congestive heart failure

CO cardiac output

cTnI cardiac troponin I

cTnT cardiac troponin T

CVP central venous pressure

DSMB Data Safety Monitoring Board

eCRF electronic Case Report Form

ECW extracellular body water

eGFR estimated Glomerular Filtration Rate

FiO2 inspired oxygen fraction

FTc corrected flow time

HFpEF heart failure with preserved ejection fraction

HFrEF heart failure with reduced ejection fraction

HR Heart Rate

ICU Intensive care unit

ICW intracellular body water

IRB Institutional Review Board

LVEF Left ventricular ejection fraction

MAP mean arterial pressure

maxNT-proBNP maximum NT-proBNP

maxTnT maximum TnT

MI Myocardial Infarction

MINS myocardial injury after noncardiac surgery

NT-proBNP n-terminal pro brain natriuretic peptide

PACU Post anesthesia care unit

pCO2 Carbon dioxide partial pressure

pO2 Oxygen partial pressure

ROS reactive oxygen species

RRT Renal replacement therapy

SAE Serious Adverse Event

SV Stroke Volume

SVR systemic vascular resistance

TBW total body water

TnT Troponin T

# Clinical Trial Summary

| **Title** | The effect of perioperative Levos**IM**endan administration on **P**ostoperative N-terminal p**R**o Brain Natriuretic Peptide concntration in patients with increased cardi**OV**ascular risk factors undergoing noncardiac surg**E**ry – A double-blinded randomized clinical trial |
| --- | --- |
| **Research Facility** | Mulitcenter  1.Dep. for Anaesthesia, Intensive Care Medicine and Pain Medicine, Medical University of Vienna, Spitalgasse 23, 1090 Vienna  2. Charité – Universitätsmedizin Berlin, corporate member of Freie Universität Berlin and Humboldt Universität zu Berlin, Department of Anesthesiology and Intensive Care Medicine, Campus Benjamin Franklin Hindenburgdamm 30, 12203 Berlin, Germany |
| **Study Size** | 230 patients |
| **Study Design** | The IMPROVE trial is a multi-center group sequential double-blinded randomized clinical trial of levosimendan versus placebo |
| **Primary Outcome** | 37% decrease of postoperative (during the first three days) maxNT-proBNP concentration in patients with increased cardiac risk factors undergoing moderate- to high risk noncardiac surgery |
| **Secondary Outcomes** | 1.  We evaluate the decrease of postoperative maxTnT in patients receiving levosimendan compared to patients receiving placebo.  2.  To determine the impact of levosimendan in the postoperative incidence of myocardial injury after non-cardiac surgery (MINS) during the first 3 postoperative days as compared to placebo.  3.  Levosimendan reduces the composite of myocardial infarction and death at 30 days and 1 year after surgery as compared to placebo. |
| **Tertiary Outcome** | Levosimendan reduces the sum of the 12-item WHODAS 2.0 disability score 30 days and 1 year after surgery. |
| **Exploratory Outcome** | All patients will be stratified based on their postoperative maxNT-proBNP concentrations according to the previous published thresholds predicting the incidence of mortality or nonfatal MI after 30 days of surgery. |
| **Eligibility (1-4)** | All patients need to meet all of the following criteria for inclusion (1-4):  1. Major surgery (as defined in appendix VII) planned for more than 2 hours  2. ≥ 65 years of age and ≤ 85 years of age  3. Provide written informed consent AND  4. Fulfill ≥ 2 of the following criteria (A-E) |
| **Inclusion Criteria (A-E)** | 1. NT-proBNP ≥ 200 ng/L 2. History of coronary artery disease defined as 1 of the following 7 criteria (I to VII): 3. History of angina 4. History of myocardial infarction or acute coronary syndrome 5. History of a segmental cardiac wall motion abnormality on echocardiography/radionuclide imaging 6. History of positive myocardial stress test (echocardiographic or radionuclide) 7. History of a coronary artery stenosis > 50% 8. ECG with pathological Q waves in any two contiguous leads 9. History of previous artery revascularizations 10. History of permanent/paroxysmal atrial fibrillation diagnosed by physician/specialist 11. History of peripheral arterial disease as defined by a physician/specialist diagnosis of a current, or prior history of any 1 of the following 5criteria (I-V) 12. Intermittent claudication 13. Stenosis ≥ 70 % detected by angiography or doppler 14. Stenosis ≤ 70% detected by angiography or doppler AND requiring medical treatment e.g. ASA or other platelet inhibitor 15. History of stroke or TIA – diagnosed by physician or CT/MRI 16. Diagnosed cerebral arteriovascular disease (cAVK) diagnosed by a physician/specialist 17. Any 3 of 10 of the following risk criteria (i – x).     - 1. History of congestive heart failure defined as a physician diagnosis of a current or prior episode of congestive heart failure OR prior radiographic evidence of vascular redistribution, interstitial pulmonary edema, or frank alveolar pulmonary edema;       2. History of a transient ischemic attack;       3. Diabetes and currently taking an oral hypoglycemic agent or insulin;       4. History of hypertension;       5. Hyperlipidemia and currently taking a lipid-lowering agent;       6. Documented chronic kidney disease diagnosed by physician/specialist and creatinine clearance > 30 ml/min       7. History of smoking within 2 years of surgery       8. Diastolic dysfunction (≥ grade 1) documented by echocardiography       9. Age ≥ 70 years       10. Preoperative Troponin T (5th generation) ≥ 25ng/dL |
| **Exclusion Criteria (A-J)** | 1. Previous adverse response and/or allergy to levosimendan 2. ICU Patients undergoing surgery 3. Preoperative Sepsis/SIRS needing ICU treatment 4. Preoperative hemodynamically instable patients, who require vasopressor or inotropic support 5. Renal or liver transplantation 6. History of severe heart failure (e.g. LVEF < 30%) 7. Patients undergoing surgery for pheochromocytoma 8. Liver cirrhosis 9. Pulmonary hypertension (mPAP > 25 mmHg) 10. Severe Renal Failure defines as creatinine clearance ≤ 30 ml/min |
| **Treatment Regimen** | The study drug (500mL) will be continuously infused with 0.1 to 0.2 µg/kg/min using an infusion-pump for at least 24 hours or until the end of the study medication. |
| **Study Period** | Day of surgery and the following five postoperative days |
| **Follow-Up** | 30 days phone follow-up  1-year phone follow-up |
| **BCM - Sub-Study**  **(Appendix III)** | **Primary Outcome**  Levosimendan improves postoperative left ventricular ejection fraction, thus we hypothesize that the number of overhydrated patients is lower in the levosimendan group as compared to the placebo group. Based on previous studies a patient will be considered as overhydrated, when the overhydration exceed 1L. For measurements we will use the body composition monitor (BCM).  **Secondary Outcome**  Reduction in AUC of the total body water (TBW).  Differences in Lean tissue index, fat tissue index, total body water, extracellular water (ECW), intracellular water (IWC), ECW/ICW, lean tissue mass, fat mass, adipose tissue mass, body cell mass; between both study groups. |
| **Renal - Sub-Study**  **(Appendix III)** | **Primary Outcome**  The preemptive administration of levosimendan will decrease the postoperative number of patients suffering from acute kidney injury (AKI) evaluated during the first three postoperative days. AKI will be classified according to the KDIGO criteria.  **Secondary Outcome**  We will further evaluate the number of patients needing postoperative renal replacement therapy during the first three postoperative days. |
| **Inflammatory Response**  **(Appendix IV)** | **Primary Outcome**  The intraoperative administration of levosimendan will significantly decrease the postoperative inflammatory response determined by consecutive IL-6 measurements during the first five days after surgery.  **Secondary Outcomes**   1. We will evaluate the difference in the maximum postoperative CRP plasma concentration between both study groups. 2. We further evaluate the correlation between inflammation and MINS. We will further stratify patients according their maximum postoperative IL-6 concentration into a high-risk (>432 pg/dL) and a low-risk group (<432 pg/dL). |
| **Echocardiography**  **(Appendix VII)** | Primary Aim Our primary outcome systolic and diastolic function between both groups. Systolic ejection fraction, stroke volume and diastolic function grade respectively will function as markers for systolic and diastolic function. Measurements will be taken preoperatively and on postoperative day 1, 3 and 5. Secondary Aim I Our secondary outcome will be the change in heart chamber sizes pre- and postoperatively, with and without Levosimendan. |

# Responsibilities Medical University of Vienna

**Principal Investigator:** Ao Univ. Prof. Dr. Edith Fleischmann

Univ. Klinik für Anästhesie, Allg. Intensivmedizin und Schmerztherapie

Medizinische Universität Wien

Spitalgasse 23

1090 Wien

**Sub-Investigator:** Dr. Christian Reiterer

Univ. Klinik für Anästhesie, Allg. Intensivmedizin und Schmerztherapie

Medizinische Universität Wien

Spitalgasse 23

1090 Wien

**Sponsor:** Medizinische Universität Wien

Spitalgasse 23

1090 Wien

**Monitor:** Dr. Thomas Hamp

Univ. Klinik für Anästhesie, Allg. Intensivmedizin und Schmerztherapie

Medizinische Universität Wien

Spitalgasse 23

1090 Wien

**Statistics:** Zentrum für Medizinische Statistik, Informatik und

Intelligente Systeme

Spitalgasse 23, BT88/E03

*Sample Size Calculation: Lukas Baumann, Bsc.Bsc.

Zentrum für Medizinische Statistik, Informatik und

Intelligente Systeme

Spitalgasse 23, BT88/E03

*Statistical Analysis: Assoc. Prof. MMag. Dr. Alexandra Graf

Zentrum für Medizinische Statistik, Informatik und

Intelligente Systeme

Spitalgasse 23, BT88/E03

Cardiology Consultant: Univ. Prof. Bernhard Frey

Univ. Klinik für Innere Medizin II

Klinische Abteilung für Kardiologie

Spitalgasse 23

1090 Wien

# Responsibilities Charité - Universitätsmedizin Berlin

**Principal Investigator:** Univ. Prof. Dr. Sascha Treskatsch

Charité - Universitätsmedizin Berlin

Klinik für Anästhesiologie m. S. operative Intensivmedizin

Charité Campus Benjamin Franklin

Hindenburgdamm 30

12202 Berlin

**Sub-Investigator:** Dr. Christian Berger

Charité - Universitätsmedizin Berlin

Klinik für Anästhesiologie m. S. operative Intensivmedizin

Charité Campus Benjamin Franklin

Hindenburgdamm 30

12202 Berlin

# Abstract

*Background*: Major cardiovascular complications occur in about 3 % of all patients undergoing non- cardiac surgery and are even higher in patients with increased preoperative risk factors. N-terminal pro brain natriuretic peptide (NT-proBNP) increases in over two third of patients undergoing surgery and is a strong predictor for perioperative myocardial complications. Levosimendan is a positive inotropic Ca2+ sensitizer and significantly reduces postoperative BNP concentration in cardiac surgery. The evidence in the non-cardiac surgery setting, however, is weak. Therefore, we will test our primary hypothesis that the perioperative administration of levosimendan significantly will reduce postoperative NT-proBNP concentrations in patients undergoing moderate- to high-risk non-cardiac surgery. We will also test the secondary hypotheses that levosimendan will reduce postoperative maximum troponin T (maxTnT) concentration, the incidence of myocardial injury after noncardiac surgery (MINS), myocardial infarction and death within 30 days and one year after surgery.

*Methods*: We will include 230 patients with increased cardiovascular risk factors undergoing moderate- to high-risk non-cardiac surgery in this randomized, double-blinded trial. Patients will be randomly assigned to receive a single infusion of 12.5 mg levosimendan or placebo. The study drug will be started after induction of anesthesia. In the study group 12.5 mg levosimendan will be infused over a time period of approximately 24 hours. Our primary outcome will be the effect of levosimendan on maximum postoperative NT-proBNP (maxNT-proBNP). We therefore measure NT-proBNP before induction of anesthesia, after surgery, on the first, second and third postoperative day.

*Statistics:* The primary endpoint, maxNT-proBNP is defined as the maximum of NT-proBNP concentration measured within 2 hours after surgery and on the first, second and third postoperative day. The primary hypothesis will be tested using a Wilcoxon-Mann-Whitney U-test. An interim analysis will be performed after the collection of data of a third of the overall planned patients. To control for the overall type 1 error rate of 0.05, O'Brien-Flemming boundaries for group sequential designs will be used, hence for the interim analysis the two-sided significance level is 0.0007 and for the final analysis the two-sided significance level is 0.0497.

*Level of originality:* Data for the use of levosimendan are mainly available in patients undergoing cardiac surgery and for these with strongly impaired cardiac function. Recent studies showed a strong association between postoperative NT-proBNP and TnT release and myocardial events, which indicates a significant impact on heart function especially during the first three days after surgery. The duration of action of levosimendan is about 7 days. Thus, we propose to administer levosimendan intraoperatively when patients are well monitored to provide maximal protection due to hemodynamic instability during the critical perioperative period. Therefore, we test the efficiency of a preemptive administration of levosimendan to decrease postoperative NT-proBNP release and further decrease of cardiovascular complications in patients with increased cardiovascular risk factors undergoing noncardiac surgery.

# Zusammenfassung

*Hintergrund:* In ca. 3 % aller PatientenInnen kommt es nach einem chirurgischen Eingriff zu einer kardiovaskulären Komplikation. In PatientInnen mit bereits vorbestehenden kardiovaskulären Risikofaktoren liegt diese Rate noch höher. N-terminales pro brain natriuretic peptide (NT-proBNP) als auch Troponin T (TnT) sind herzspezifische Laborparameter mit einem starken prädiktiven Wert für das Auftreten perioperativer myokardialer Komplikationen.

Levosimendan ist ein positiv inotropes wirkendes Medikament, welches die Affinität der Ca2+ Ionen zum Tropomyosin erhöht und dadurch die Herzfunktion verbessert, ohne dabei den myokardialen Sauerstoffverbrauch zu erhöhen. Die Gabe von Levosimendan führte zu einer signifikanten Reduktion der BNP und Troponin I Konzentration bei herzchirurgischen PatientInnen. Bis dato fehlen Daten über die Wirkung von Levosimendan bei allgemeinchirurgische PatientInnen.

Unsere primäre Hypothese postuliert, dass eine präemptive Gabe von Levosimendan zu einer signifikanten Reduktion der postoperativen NT-proBNP und Troponin T Konzentrationen führt. Diese Studie wird an PatientInnen durchgeführt, welche bereits präoperativ vorbestehende kardiovaskuläre Risiken aufweisen und eine mittlere- bis hochriskante nicht-herzchirurgische Operation erhalten. Unsere sekundäre Hypothese postuliert eine Reduktion des postoperativen maximalen Troponin T Anstieges, eine Reduktion der Inzidenzen von MINS, Herzinfarkt und Tod bei PatientInnen innerhalb von 30 Tagen und 1 Jahr, durch die Gabe von Levosimendan.

*Methode:* In diese prospektiv-randomisierte Studie werden 230 PatientInnen mit erhöhten kardiovaskulären Risikofaktoren für nicht-herzchirurgischen Eingriffe mit mittlerem- bis hohem Risiko für postoperative kardiale Komplikationen eingeschlossen. PatientInnen in der Levosimendan Gruppe erhalten eine Einmalinfusion von 12.5mg Levosimendan und PatientInnen in der Placebo Gruppe erhalten eine Infusion mit Placebo. Die Studienmedikation wird nach Einleitung der Allgemeinanästhesie begonnen und mit einer Rate von 0.2µ/kg/min über einen Zeitraum von ungefähr 24 Stunden verabreicht.

Als primäres Outcome wurde eine 37%ige Reduktion des maximalen postoperativen NT-proBNP Anstieges festgelegt. Die Messung der primären Outcomeparameter erfolgt innerhalb von 2 Stunden nach Ende der Operation und jeweils am 1., 2. und 3. postoperativen Tag. Als sekundäre Outcomeparameter wurden der postoperative TnT Anstieg, die Inzidenzen von MINS, Myokardinfarkt und Tod innerhalb von 30 Tagen und 1 Jahr nach der Operation festgelegt.

*Neuheit:* Bisherige Studienergebnisse liegen für herzchirurgische PatientInnen bzw. bei PatientInnen mit stark eingeschränkter Linksventrikelfunktion vor. Aktuelle Studien zeigen einen signifikanten Zusammenhang zwischen der postoperativen NT-proBNP und Troponin T Konzentration und dem postoperativen Auftreten myokardialer Komplikationen. Dies spiegelt die ausgeprägte perioperative Belastung durch verschiedene Faktoren auf den Herzmuskel wieder. Im Rahmen dieser Studie wird Levosimendan intraoperativ verabreicht, d.h zu einem Zeitpunkt an dem PatientInnen am engmaschigsten hämodynamisch überwacht werden. Die Wirkdauer von Levosimendan beträgt ca. 7 Tagen und soll dadurch auch die Herzfunktion, speziell in der vulnerablen Zeit in den ersten postoperativen Tagen, verbessern. Daher wollen wir die Effizienz einer präemptiven Gabe von Levosimendan auf die postoperative NT-proBNP und TnT Konzentration untersuchen. Erhöhte postoperative NT-proBNP und TnT Konzentrationen sind ein Indikator für postoperative kardiovaskuläre Komplikationen speziell bei PatientInnen mit erhöhten kardialen Risikofaktoren.

# Background

## Introduction

Globally more than 200 million adults undergo major non cardiac surgery (i.e. defined as surgery requiring an overnight hospital stay) annually.1 Fifty percent of these patients are more than 45 years of age and have an increased risk of perioperative complications.2 Major cardiovascular complications occur in 3% of patients undergoing major noncardiac surgery3 and about 1.5% die within 30 day after surgery.4 Major cardiac complications are especially relevant due to morbidity, prolonged hospitalization, health care costs and outcome. Current studies indicate that most of cardiovascular events happen during the first three postoperative days. (Confidential data not yet published) Hypotension5, tachycardia,6and fluid overload (Confidential data not yet published) are strongly associated with cardiovascular events.

The perioperative measurement of cardiac biomarkers helps to evaluate a cardiac risk profile of each individual patient.47 8 NT-proBNP is a potent biomarker to assess perioperative myocardial stress, which has a high predictive value for postoperative morbidity. BNP is a peptide hormone, which is released during increased myocardial wall stress.9 10 BNP is a predictor for mortality when measured preoperatively and postoperatively. *Preoperative* brain natriuretic peptide (BNP) measurement, for example, is an optimal parameter to assess cardiac performance in patients undergoing noncardiac surgery.11 Furthermore, preoperative evaluation of NT-proBNP improves the prediction of adverse cardiac-events in the immediate postoperative period after major non-cardiac surgery.8 Perioperative NT-proBNP/BNP measurement is recommended for risk assessment in patients who are 65 years of age or older, or are 45-64 years of age with significant cardiovascular disease or have RCRI score > 1 undergoing non-cardiac surgery.12

Troponin T is a further very well-established biomarker to assess myocardial injury after noncardiac surgery. It is a strong predictor of perioperative mortality.4 13

A meta-analysis of 2179 patients revealed that *postoperative* BNP values over 92 ng/L or NT-proBNP over 300 ng/L were the strongest independent predictor of 30 day mortality and nonfatal myocardial infarction (MI).7 Interestingly, in one of our previous studies we detected increased postoperative BNP values even in a relatively healthy patient population (RCRI < 2) during moderate to high risk abdominal surgery. (data not yet published)

Levosimendan is a positive inotropic drug with a duration of action of approximately 7 days after a single dose administration. Therefore, it might be an option to improve cardiac function in patients with increased cardiovascular risk factors specifically during the crucial perioperative period. In previous trials, the intraoperative administration of levosimendan reduced the length of ICU days and, decreased the need of other inotropic and vasopressor therapies, and increased left ventricular ejection fraction. 14–16 Data regarding the perioperative administration of levosimendan is only available in patients undergoing cardiac surgery. So far, the drug has not been tested in patients with increased cardiovascular risk factors undergoing noncardiac surgery.

Therefore, we will test our primary hypothesis that a single dose of levosimendan will decrease postoperative NT-proBNP concentrations in patients with increased cardiovascular risk factors undergoing moderate-to high-risk non-cardiac surgery. We will also test the secondary hypothesis that levosimendan decreases postoperative maxTNT release, further reduces postoperative cardiovascular complications such as myocardial injury (MINS), myocardial infarction, and death within 30 days and 1 year after surgery.

## Levosimendan

### Clinical evidence regarding safety of Levosimendan

Levosimendan is an inodilator (Ca2+ sensitizer and K+ channel opener), which increases left ventricular ejection fraction without increasing myocardial oxygen consumption in patients with heart failure.

In 106 patients undergoing coronary artery bypass surgery, pre-treatment with levosimendan resulted in significantly lower release of troponin I (*p* < 0.0001), a reduction in tracheal intubation time, less requirement for inotropic support, and a shorter length of ICU stay. In this study levosimendan caused an increase in blood pressure and cardiac index associated with a decrease in systemic vascular resistance.14

In the LEVO-CTS trial 882 patients undergoing cardiac surgery were randomly assigned to received levosimendan or placebo prophylactically.17 There was reduction of the short-term composite end point of death, renal-replacement therapy, perioperative myocardial infarction, or use of a mechanical cardiac assist device that was lower than the rate with placebo among patients with a reduced left ventricular ejection fraction who were undergoing cardiac surgery with the use of cardiopulmonary bypass. However, levosimendan significantly reduced the incidence of low cardiac output syndrome (*p* = 0.007). Death at 90 days occurred in 4.7% of patients in the levosimendan group as compared to 7.1% in the placebo group – however this was not statistically significant. These rates of prespecified safety endpoints, including hypotension, atrial fibrillation, ventricular tachycardia or fibrillation, resuscitated cardiac arrest, and stroke, did not differ significantly between both groups.

The LICORN trial included 345 patients with low ejection fraction undergoing artery bypass grafting with cardiopulmonary bypass.18 There was no difference in in-hospital death (*p* =0.59), mortality at day 28 (*p* = 0.39) and 180 (*p* = 0.59) after surgery between the levosimendan group and the placebo group. Furthermore, no difference in possible side effects of levosimendan including, postoperative atrial fibrillation (*p* = 0.09), ventricular tachycardia (*p* = 0.72), ventricular fibrillation (*p* = 0.67) and third-degree atrioventricular block (*p* = 0.08) was shown. Many of the outcomes of this trial seem to favor levosimendan without showing statistical significance. Moreover, it seems likely that this study was slightly underpowered.

A meta-analysis including 4246 patients from 40 randomized revealed that the administration of levosimendan was associated with lower postoperative mortality, acute kidney injury, and renal replacement therapy, but coincides with a higher incidence of hypotension.19 There is not enough high-quality evidence to neither support nor discourage the systematic use of levosimendan in cardiac surgery.

### Biomarkers

#### Natriuretic Peptides

NT-proBNP is released during increased myocardial wall stress. BNP is enzymatically cleaved by corin to N-terminal pro BNP (NT-proBNP).9 10 Binding of BNP to natriuretic peptide receptor A and natriuretic peptide receptor B lead to natriuresis, vasodilation and renin inhibition. Furthermore, there is also anti-mitogenic, anti-ischemic and positive lusitropic activity.10 Cardiac protection against collagen formation and accumulation by inhibiting cardiac remodeling and progression of heart failure were described as well.20 21

BNP is a reliable marker to estimate cardiac function in patients with heart failure with reduced ejection fraction (HFrEF) and patients with heart failure with preserved left ventricular ejection fraction (HFpEF).22 There is also data that BNP significantly correlates with Doppler imaging and provides a reliable estimation of left ventricular diastolic pressure.23

Mechanical stress in particular ventricular distension and non- mechanical stress including ischemia, inflammation, redox stress, catecholamines, angiotensin II and endothelin-1 leads to an increased release of myocardial NT-proBNP/BNP from the ventricle.24 BNP concentrations of >245 pg/ml are associated with a significant increase of 30-day mortality, cardiac mortality and cardiac failure.4

#### Troponin T

Troponin is a protein which is an integral part in the striated muscle. Measurements of cardiac specific troponin T (TnT) helps to identify high-risk patients undergoing noncardiac surgery. Peak TnT concentrations during the first 3 days are a major predictor for increased 30-day mortality. Moreover, TnT is a reliable marker to detect myocardial ischemia.

# Plan of Investigation

## Trial Design

The IMPROVE trial is a multi-center group sequential double-blinded randomized clinical trial including 230 patients with an increased cardiovascular risk profile. After data of 76 patients (38 per group) will be available, we will perform an interim analysis. Patients will be randomized either receiving levosimendan or placebo after induction of anesthesia. Patients, health care providers, data collectors, outcome adjudicators, and investigators will be blinded to the allocation to each study group (levosimendan or placebo). Figure 1 shows the patients flow chart.

## Primary Outcome

The administration of levosimendan improves LVEF and myocardial oxygen perfusion, which will be reflected in a decrease of postoperative NT-proBNP concentration.25 Since NT-proBNP is a strong predictor for postoperative cardiovascular complications in patients undergoing noncardiac surgery7, we want to test the efficiency of levosimendan to decrease postoperative maxNT-proBNP concentrations in patients with increased cardiac risk factors undergoing moderate- to high-risk noncardiac surgery.

*Hypothesis*

In comparison to placebo, intraoperative single-dose administration of 12.5mg levosimendan decreases postoperative maxNT-proBNP measurements within 2 hours after surgery, on the first, second and third postoperative day, in patients with increased cardiovascular risk factors undergoing moderate- to high-risk noncardiac surgery.

## Secondary Outcomes

### Aim 1

Maximum rise of postoperative Troponin T (TnT) – as an indicator of MINS

Hypothesis 1: Levosimendan improves myocardial perfusion and might therefore reduce the postoperative maximum rise in TnT

### Aim 2

*Myocardial injury after noncardiac surgery* (MINS) - is associated with increased postoperative cardiac mortality.

*Hypothesis* 2 – Levosimendan decreases the incidence of MINS during the first 3 postoperative days as compared to placebo in patients with increased cardiovascular risk factors undergoing moderate- to high-risk noncardiac surgery. MINS is defined as: (i) a non-high-sensitivity troponin T >_30ng/L2 and (ii) a high-sensitivity troponin T (hsTnT) of 20 to <65 ng/L with an absolute change of at least 5 ng/L—this change threshold is independently associated with 30-day mortality [hazard ratio (HR) 4.69; 95% confidence interval (CI) 3.52–6.25]—or an hsTnT level >_65ng/ L. 26

Furthermore, an absolute change of at least 5 ng/L is independently associated with 30-day mortality and will also be defined as MINS. TnT will be measured within 2 hours after surgery, on the first, second and third postoperative day.

### Aim 3

*Cardiovascular morbidity* – Evaluation of differences event rates of myocardial infarction and death at 30 days and 1 year after surgery.

﻿*Hypothesis 3* – Levosimendan reduces the event rates of myocardial infarction and death during 30 days and 1 year after surgery as compared to placebo. Myocardial infarction is defined as a rise of TnT at least one value is above the 99th percentile URL and with at least one of the following: (i) symptoms of acute myocardial ischaemia; (ii) new ischaemic ECG changes; (iii) development of pathological Q waves; (iiii) imaging evidence of new loss of viable myocardium; (v) new regional wall motion abnormality in a pattern consistent with an ischemic ethiology; (vi) identification of a coronary thrombus by angiography including intracoronary imaging or autopsy.27

### Aim 4

We will use the 12-item WHODAS 2.0 score to assess health and disability. We evaluate 6 domains of life i.e. *cognition, mobility, self-care, getting along, life activities*, and *participations.*

We evaluate the WHODAS 2.0 score before surgery on the day of consent, 30 days after surgery, and 1 year after surgery per phone call. For analyzing we use simply scoring. Each score is assigned to each of the following items – “none” (0), “mild” (1), “moderate” (2), “severe” (3), and “extreme (4). We will simply add up the scores from the items without recoding or collapsing of response categories, thus, there is no weighting of the individual items. As a result, the simple sum of the scores of the items across all domains constitutes a statistic that is sufficient to describe the degree of functional limitations.

## Exploratory Outcome

Perioperative NT-proBNP elevations are associated with postoperative mortality, cardiac mortality, mortality and nonfatal MI, and cardiac failure at both 30 days and 180 days or more after surgery. 7

NT-proBNP values have been stratified to the following threshold to predict mortality or MI.7 (Table 1)

Number of patients stratified according to the following determined threshold group will be compared between the levosimendan and the placebo group.

Table 17


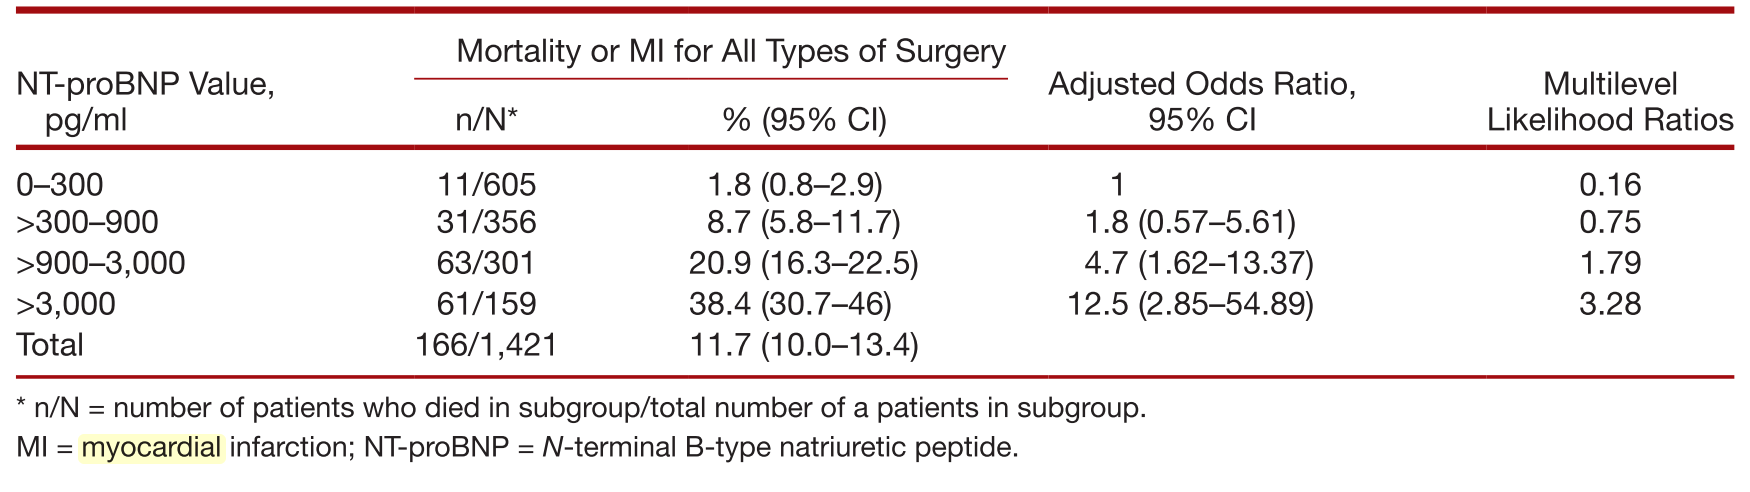


# Material and Methods

- Eligibility: 45 years of age or older AND undergoing elective moderate- to high risk noncardiac surgery under general anaesthesia.

## Eligibility

All patients need to meet all of the following criteria for inclusion (1-4):

1. Major surgery (as defined in appendix VII) planned for more than 2 hours

2. ≥ 65 years of age and ≤ 85 years of age

3. Provide written informed consent AND

4. Fulfill ≥ 2 of the following criteria (A-E)

### Inclusion Criteria (A – E)

1. NT-proBNP ≥ 200 ng/L
2. History of coronary artery disease defined as 1 of the following 7 criteria (I to VII):
3. History of angina
4. History of myocardial infarction or acute coronary syndrome
5. History of a segmental cardiac wall motion abnormality on echocardiography/radionuclide imaging
6. History of positive myocardial stress test (echocardiographic or radionuclide)
7. History of a coronary artery stenosis > 50%
8. ECG with pathological Q waves in any two contiguous leads
9. History of previous artery revascularizations
10. History of permanent/paroxysmal atrial fibrillation diagnosed by physician/specialist
11. History of peripheral arterial disease as defined by a physician/specialist diagnosis of a current, or prior history of any 1 of the following 5criteria (I-V)
12. Intermittent claudication
13. Stenosis ≥ 70 % detected by angiography or doppler
14. Stenosis ≤ 70% detected by angiography or doppler AND requiring medical treatment e.g. ASA or other platelet inhibitor
15. History of stroke or TIA – diagnosed by physician or CT/MRI
16. Diagnosed cerebral arteriovascular disease (cAVK) diagnosed by a physician/specialist
17. Any 3 of 10 of the following risk criteria (i – x).
    - 1. History of congestive heart failure defined as a physician diagnosis of a current or prior episode of congestive heart failure OR prior radiographic evidence of vascular redistribution, interstitial pulmonary edema, or frank alveolar pulmonary edema;
      2. History of a transient ischemic attack;
      3. Diabetes and currently taking an oral hypoglycemic agent or insulin;
      4. History of hypertension;
      5. Hyperlipidemia and currently taking a lipid-lowering agent;
      6. Documented chronic kidney disease diagnosed by physician/specialist and creatinine clearance > 30 ml/min
      7. History of smoking within 2 years of surgery
      8. Diastolic dysfunction (≥ grade 1) documented by echocardiography
      9. Age ≥ 70 years
      10. Preoperative Troponin T (5th generation) ≥ 25ng/dL

## Exclusion Criteria

1. Previous adverse response and/or allergy to levosimendan
2. ICU Patients undergoing surgery
3. Preoperative Sepsis/SIRS needing ICU treatment
4. Preoperative hemodynamically instable patients, who require vasopressor or inotropic support
5. Renal or liver transplantation
6. History of severe heart failure (e.g. LVEF < 30%)
7. Patients undergoing surgery for pheochromocytoma
8. Liver cirrhosis
9. Diagnosed pulmonary hypertension (mPAP > 25 mmHg – right heart catherization) requiring treatment
10. Severe Renal Failure defines as creatinine clearance < 30 ml/min

## Patient Recruitment and Informed Consent

Study personal will screen daily surgical lists in the operating center and the services of anesthesia for surgery. Study personnel will approach all eligible patients to obtain informed consent before surgery. Previous experience showed that approximately 3-4 patients per week will meet the inclusion criteria. Therefore, we assume a period of 12 to 24 month to complete this trial.

## Randomization

Randomization will be conducted after noninvasive blood pressure measurement is performed (within 1 hour before induction of anesthesia). Thereafter, patients will be randomized with the online randomization program “Randomizer” (Randomizer, Medical University of Graz, Graz, Austria <https://www.meduniwien.ac.at/randomizer/web/login.php>) provided by the Medical University of Vienna. Randomization will be performed using permutated blocks. There will be no stratification of the randomization.

Randomization can only be performed by registered persons. For log-in, an individual User-ID and password entry are necessary. To ensure the double-blind character of the study, only the unblinded study personal can log in that are involved in the preparation of the study drug, but not in the data acquisition. Randomization will be conducted only if the patient can be included in the study (checking of inclusion and exclusion criteria; written informed consent of the patient; preoperative blood pressure measurement). Before randomization, the person who conducts the randomization receives information about the ID-number of the patient that should be randomized. The ID-Number will be a consecutive number of the patients who meet the inclusion criteria. The advantage of the online randomization with the “Randomizer” is that for each patient, information will be available, when the patient was randomized and by whom. Thereafter, patients will receive an intraoperative infusion of 12.5 mg levosimendan or placebo for 24 hours.

*Infusion of the study drug will be started immediately after skin incision. after shortly after endotracheal intubation and placement of appropriate venous access. Patients will not be informed regarding their randomization. (Figure 1).*

***Verum - Group:*** *Immediately after skin incision patients allocated to the verum group will receive a dose of 12.5 mg in 500mL of levosimendan.*

***Placebo - Group:*** *Immediately after skin incision patients allocated to the placebo group will receive 500mL of 5% Glucose.*

## Anonymization

Data of all patients will be pseudo-anonymized using a consecutive ID-number for each patient enrolled into this trial. The ID-number will be provided by the web-based randomization program. Decoding will only be possible for the primary investigator of this study. No data on patient identity will be presented.

## Trial Interventions

Due to the previous described possibility of severe hypotension after bolus administration of levosimendan, we will waive the bolus at the beginning of the study drug administration. The study drug infusion will not be started within the early postinduction phase during which hypotension is most prevalent.28 In every patient the study drug will be started immediately after skin incision.

In the case, that the patient will need continuous vasopressor administration (when phenylephrine, etilefrine or ephedrine as appropriate, bolus administration is not sufficient) at the time during skin incision we will halve the study drug infusion rate and start with of 0.1 µg/kg/min.

The study drug (500 mL) will continuously be infused with 0.1 - 0.2 µg/kg/min with a motor-pump for approximately 24 hours.

Study drug infusion rate will be adapted as recommended in the investigators brochure as follows:

1. The study drug infusion will be stepwise reduced of about 0.05 µg/kg/min in the case if clinical significant hypotension (mean arterial pressure < 55mmHg for more than 10 minutes)29 or tachycardia occurs. We defined clinical significant hypotension when for adequate hemodynamic maintenance a continuous noradrenaline infusion of more than 0.1 mcg/kg/min is needed, without signs of hypovolemia, bleeding or sepsis.
2. Infusion rate will be increased up to 0.2 g/kg/min during hemodynamic stability. This is defined as mean arterial pressure within the 20% range of the baseline measurements without the need of vasopressor support.

During drug administration, patients will be closely monitored with EKG, SpO2, andblood pressure. Patients will stay at the Post-Anesthetic Care Unit (PACU) or Intensive Care Unit (ICU), as long the study drug will be infused. We will include patients with or at risk for cardiovascular events having noncardiac surgery. It is standard of care for these patient population to have a prolonged postoperative observational time.

**Figure 1**

## Study Drug Preparation

~~Levosimendan and the placebo will be provided to the investigator by Orion Pharma as a sterile, clear, yellow to orange solution in clear glass vials.~~ Each vial contains a 5 mL volume, which is intended for single use only. Levosimendan is supplied at a 2.5 mg/mL (12.5mg/5 mL) and include levosimendan, povidone, citric acid and ethanol.We will use Simdax® (Orion Cooporation, Finnland) containing 12.5mg in each vial.

### Placebo

Placebo will be provided as a sterile infusion solution including a coloring agent in order to achieve a similar color to levosimendan. For the composition of placebo for levosimendan 2.5mg/mL infusion concentrate we will use Soluvit® (Fresenius Kabi Austria, Austria) and FrekaVit® (Paesel & Lorei GmbH & Co.KG, 47495 Rheinberg, Germany, which will be used at the Charité) vials, of which each vials contains thiamin mononitrate 3.1mg, riboflavine natriumposphate 4.9mg, nicotinamide 40mg, pyridoxine hydrochloride 4.9mg, panthothenic acid 16.5mg, ascorbic acid 113mg, biotin 60mg, folic acid 0.4mg, cyanocobalamin 5µg.

### Packaging

Levosimendan and placebo will be provided in sterile, single-use only clear upper-stoppered glass vials. Details on the packaging of the study drug will be provided in the study manual.

### Labeling

Study drug labels and cartons will contain information to meet the applicable regulatory requirements.

Specialized drug accountability forms will be provided for tracking the study drug administration.

### Preparation and Handling

~~Our study drug will be provided by Orion Pharma (Orion Corporation, Espoo, Finland).~~

The study solution will be prepared and handled from an unblinded study staff, which is not involved in patient treatment and outcome assessment.

***Levosimendan***
Levosimendan 2.5 mg/ml injection contains levosimendan 2.5 mg, povidone, citric acid, 785mg.mL-1 ethanol. Levosimendan injection is a clear, yellow to orange solution.

The injection is packaged in 8 mL (with 5 mL filling volume) injection vials made of colorless transparent Type I glass (Ph. Eur. / USP).

The injection vials are closed with sterilized, coated rubber closures and sealed with an aluminum cap.

***Placebo***For the Placebo solution we will use Soluvit® (Fresenius Kabi Austria GmbH, 8055 Graz, Austria) at the Medical University of Vienna and FrekaVit® (Paesel & Lorei GmbH & Co.KG, 47495 Rheinberg, Germany) at the Charité, Universitätsmedizin Berlin).

Soluvit® and FrekaVit® contain the same amount and number of vitamins as listed below:

Soluvit®: thiamin mononitrate 3.1mg, riboflavine natriumposphate 4.9mg, nicotinamide 40mg, pyridoxine hydrochloride 4.9mg, panthothenic acid 16.5mg, ascorbic acid 113mg, biotin 60mg, folic acid 0.4mg, cyanocobalamin 5µg.

FrekaVit®: thiamin mononitrate 3.1mg, riboflavine natriumposphate 4.9mg, nicotinamide 40mg, pyridoxine hydrochloride 4.9mg, panthothenic acid 16.5mg, ascorbic acid 113mg, biotin 60mg, folic acid 0.4mg, cyanocobalamin 5µg.

Both drugs will be provided as injection powder for solution. Soluvit® and FrekaVit®, respectively, will be solved in 5mL aqua. The solution will be

Placebo for levosimendan 2.5 mg/ml injection contains riboflavine sodium phosphate 0.4 mg, dehydrated alcohol 100 mg and water for injection to 1 mL.

Study drug (levosimendan infusion concentrate, placebo concentrate) will be stored between 2-8°C according to the investigator brochure, using a temperature monitored refrigerator which will be locked and protected from light.

The study drug will be prepared immediately prior to use. Dilution of the study drug will be performed as described as following:

One 5 mL vials of study drug are added in 500 mL of 5% glucose.

## Anesthesia protocol

According to the clinical standard of care all patients receive an ECG, blood pressure and peripheral oxygen saturation. We will measure arterial blood pressure after induction of anesthesia in all patients. A central venous line will be placed and monitored as necessary.

Anesthesia will be induced with 1-3 µg/kg/ body weight (BW) fentanyl, 2 mg/kg/BW Propofol and 0.6 mg/kg/BW rocuronium. All patients will be endotracheal intubated. Anesthesia will be maintained with sevoflurane in a mixed oxygen carrier gas and propofol infusion of 6-8 mg/kgBW, respectively. Sevoflurane or propofol concentration will be titrated adjusted using processed electroencephalography (NarcoTrend, Narcotrend-Gruppe, Hannover, Germany). Fentanyl boli will be administered if necessary. When remifentanil will be used, the infusion rate will be increased until adequate analgesia will be reached. We will give additional muscle relaxation to maintain 1-2 mechanical twitches in response to supra-maximal stimulation (Train-of-Four stimulation, target of < x75%).

For mechanical ventilation a FiO2 between 0.3 and 0.5 will be used to maintain a SpO2> 95% or pO2 of > 80mmHg.Tidal volume will be set between 6 and 8mL lean body weight to maintain end-tidal CO2 within 35-40 mmHg. Positive end expiratory pressure will be set at 5 mmHg or higher according to the patient´s requirements.

We will actively warm patients with convective warming to maintain perioperative normothermia.

Fluid management during surgery will be goal-directed guided using an esophageal Doppler (CardiacQ, Deltex Medical, Chichester, Westsussex) or pulse-contour analysis (e.g. EV100, Edwards Lifesciences, Irvine, CA) as appropriate according to a previous published algorithm.30 We will use an acetate buffered crystalloid solution according to the standard of clinical care. In the case of acute bleeding volume administration according to the algorithm may not be sufficient. To keep place with fluid requirements, further volume boluses (5% albumin, 20% albumin) will be administered as necessary according to the attending anesthesiologist. Transesophageal echocardiography will be performed per clinical judgement.

We will maintain a hematocrit of at least 26 %.

### Blood Pressure Management

Blood pressure will be managed as follows:

If the MAP falls below 65 mmHg a bolus of phenylephrine 0.1 – 0.2 mg will be given to achieve blood pressure above MAP 65 mmHg. Phenylephrine will be dosed up to maximum dose of 1 mg phenylephrine per hour. If more than a total of 1mg of phenylephrine in multiple boluses will be necessary within 1 hour, or the degree of hypotension will be likely to require more than 1 mg per hour, continuous infusion of norepinephrine will be started at a dose of 0.01 – 0.02 µg/kg/min and titrated to achieve MAP > 65 mmHg. For further intraoperative blood pressure management see Figure 2.

Figure 2:


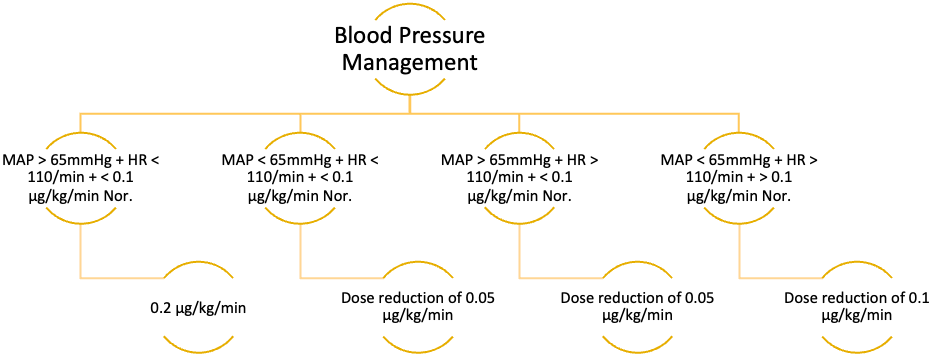


Reevaluation every 30 minutes: if necessary further dose reduction OR if possible, increase dose – 0.05µg/kg/min

## Follow-Up

During postoperative study drug infusion, the patient will be closely monitored at the post anesthesia care unit and intensive care unit, respectively.

An investigator will visit all patients during their hospital stay on the first, second and third day after surgery. During the visits the investigators will evaluate the incidence of possible side effects. To detect any changes in cardiac rhythm or new onset of cardiac arrhythmias, an ECG will be performed daily during the first three days. After hospital discharge the patient discharge record will be used for evaluation of the in-hospital adverse events.

An investigator will call all participants 30 day and 1 year after surgery to evaluate cardiovascular morbidity.

All adverse events will be recorded in the appropriate section of the CRF.

## Perioperative Patient Management

The perioperative management will be handled with the current standard of care according the guidelines published by the Austrian Society for Anesthesiology (ÖGARI). The postoperative management of medication will be done according to the attending physician. There will be no changes of any medication because related to this trial.

The VISION Study showed that clinically important hypotension is common on the first few days after surgery. Hypotension occurred most frequently (12%) on postoperative day 1; however, 5% and 2% of patients experience at least one episode of clinically important hypotension on postoperative day 2 and day 3, respectively. 31

# Measurements

## Demographic and Morphometric Data

Basic data including age, sex, body mass index, gender, ASA physical status, revised cardiac index, will be recorded. We will record social history including tobacco and alcohol use, comorbidities, long-term medication, type of surgery. Preoperative laboratory values such as creatinine, hemoglobin, sodium, c-reactive protein, and cardiac biomarkers (troponin T, BNP and Copeptine) will be recorded as well.

## Laboratory Measurements

### Cardiac Biomarker

Study specific blood samples will include N-terminal brain natriuretic peptide (NT-proBNP) and cardiac Troponin T (TnT). We will further perform Copeptin measurements to improve our cardiovascular risk stratification. Department of Laboratory Medicine at the Medical University of Vienna will assess our biomarker measurements. Institute of Laboratory Medicine, Clinical Chemistry and Pathobiochemistry – Charité will measure blood samples which will be drawn at the Charité – Universitätsmedizin Berlin. Blood samples will be treated with standard care to provide best accuracy of measurement by the department of laboratory medicine. Study specific blood samples will be drawn shortly before induction of anesthesia, within 2 hours after surgery and on the first, second and third postoperative day. Routine blood tests will be performed according to the attending physician. All results will be recorded. (see Appendix V)

## Records of Routine Data

### Intra/postoperative Data

Routine intra- and postoperative anaesthesia specific data will be extracted from our electronic anesthesia records. Intraoperatively, arterial blood gas analysis, time of anesthesia and surgery, intraoperative fluid management, blood loss, blood given, urinary output, intraoperative medication, and hemodynamic data (MAP, HR, SV, CO, CVP, SVR, FTc) and the use of vasopressors will be recorded. At the PACU and ICU, respectively, blood pressure heart rate, fluid management urinary output, use of vasopressors will be recorded. At the ward blood pressure will be measured routinely 4 times per day at least for the first three postoperative days. For our substudy, we will record fluid requirements and urinary output for the first 3 days as well. (see Appendix III)

### Laboratory Measurements

Routinely performed laboratory parameters during the first 3 postoperative days will be recorded.

## Follow Up

Duration of hospitalization, based on the discharge report, will be recorded in all study patients. Research personnel will follow up patients throughout hospitalization.

We will perform a phone follow up at 30 day and 1 year after surgery. Hospital record will be checked in the case of readmission. We further will perform the WHODAS 2.0 (see Appendix VI) questionnaire evaluate disability.

Every patient will receive a copy of the WHODAS 2.0 questionnaire before discharge of hospital to facilitate the implementation. Research personal will call patients ± 5 days at 30 days and 1 year after discharge and will stepwise query the questions.

## Data Analysis and Sample Size

### Primary Endpoint and Hypothesis

The primary endpoint, maxNT-proBNP is defined as the maximum of the NT-proBNP values measured within 2 hours after surgery and on the first, second and third postoperative day. The primary hypothesis: Intraoperative single-dose (12.5 mg) administration of levosimendan decreases maxNT-proBNP as compared to placebo in patients with increased cardiovascular risk factors undergoing moderate-to-high risk noncardiac surgery.

### Statistical Analysis

The primary hypothesis will be tested using a Wilcoxon-Mann-Whitney-U test. If a patient dies before BNP on postoperative day 3 can be measured, the patient's maxNT-proBNP will be set to the maximum of maxNT-proBNP values over all patients. An interim analysis will be performed after the collection of data of a third of the overall planned patients. To control for the overall type 1 error rate of 0.05, O'Brien-Flemming boundaries for group sequential designs will be used, hence for the interim analysis the two-sided significance level is 0.0007 and for the final analysis the two-sided significance level is 0.0497.32

The secondary hypothesis (AIM1), whether Levosimendan decreases maxTnT – which is defined as the maximum of the TnT values measured within 2 hours after surgery and on the first, second and third postoperative day – as compared to placebo will be tested using a Wilcoxon-Mann-Whitney U-test.

The secondary hypothesis (AIM2), whether Levosimendan decreases the incidence of MINS during the first 3 postoperative days as compared to placebo, a logistic regression will be calculated, where incidence of MINS during the first three days is the dependent variable, and the treatment group is the explanatory variable. Furthermore, age and sex will be used as covariates.

The secondary hypothesis (AIM3), whether Levosimendan reduces the event rates of myocardial infarction and death during 30 days after surgery as compared to placebo will be tested with a Cox proportional-hazards model. The composite endpoint myocardial infarction and death during 30 days is the dependent variable and the treatment group is the explanatory variable. Age and sex will be used as covariates.

The number of patients between both study groups grouped according to the previous evaluated NT-proBNP thresholds will be analyzed with a chi-squared test.

Baseline characteristics such as age, sex, ASA physical status, revised cardiac index, tobacco and alcohol use, comorbidities, long-term medication and type of surgery, as well as laboratory values such as creatinine, hemoglobin, sodium and c-reactive protein will be analyzed descriptively. For continuous variables mean, standard deviation, minimum, 1st quartile, median, 3rd quartile and maximum will be calculated for both treatment groups. For categorial variables, absolute and relative frequencies will be calculated for both treatment groups.

If hospital discharge occurs before the third postoperative day, the maximum value of the available data will be used for outcome measure.

For analysis of our tertiary outcome (AIM4) we will use a chi-squared test to compare the individual scores between both study groups on each measurement timepoint and furthermore we will compare the total sum of all scores between both study groups using a Wilcoxon rank-sum test.

### Sample Size Considerations

For the control group, data from a previous study was available, where NT-proBNP was measured within 1 hour after surgery and on postoperative day 1 and 3. The maximum of these values was calculated. For the calculation of the sample size, we assume median maxNT-proBNP is reduced by 37% 25in the treatment group. To estimate the power, the distribution of the z-approximations of the Wilcoxon test statistics was estimated using the bootstrap method. 10000 bootstrap samples were drawn. The data for the control group was sampled from the data from the previous study. The data for the treatment group was sampled from the same data set, where all values were reduced by 37%. We considered a drop-out rate of 5%. With a total sample size of 230 (115 per group, with a planned interim analysis after 38 patients per group) the overall estimated power (i.e. the power to reject either at interim or at the final analysis) is 80%. To correct for multiple testing due to the interim analysis, O'Brien-Flemming's design was used (see statistical analysis).

# Risk/benefit assessment

## Risk

The administration of levosimendan is accompanied with side effects such as headache, dizziness, insomnia, tachycardia, hypotension, heart failure, atrial fibrillation, hypokalemia, MI, low hemoglobin, emesis, constipation and diarrhea. Nevertheless, levosimendan was described as well tolerated in previous large trials investigating hospitalized patients with acute severe heart failure. We excluded patients with a history of severe heart failure, thus no serious side effects will be expected. Furthermore, the study medication will be started during surgery during a time period, when the patient will be closely hemodynamically monitored.

Severe hypotension and other side effects were described when levosimendan was started in patients with a systolic blood pressure lower than 100 mmHg. To reduce the risk for severe hypotension we will only enroll patients with a systolic blood pressure more than 110 mmHg28 (measured before induction of anesthesia).

To further minimize the risk for severe intraoperative hypotension we will not include patients for emergency surgery, older than 85 years or receiving spinal/or epidural anesthesia.28

## Benefit

The most susceptible phase during the perioperative period is the time between the first and third postoperative day.33 34 Perioperative hypotension, tachycardia and hypovolemia and/or fluid overload are associated with increased cardiovascular events.35 The long duration of action of levosimendan of approximately 7 days, might therefore be beneficial to support patients during the first 3 postoperative days. Studies showed improved hemodynamic stability in patients in patients with congestive heart failure, who received a single dose of levosimendan.36 Furthermore, the administration of levosimendan increases cardiac contractility caused by calcium sensitization of troponin C and further has cardioprotective properties mediated by opening mitochondrial potassium channels.

In patients with acute heart failure, levosimendan significantly reduced NT-proBNP within 3 hours of starting the infusion compared to treatment with dobutamine. 25

The risk and benefit profile of levosimendan in the noncardiac surgery setting has not yet been established.

However, all patients will be monitored during the trial for cardiac events and will be immediately treated.

In the case of a clinical relevant Troponin T increase combined with significant clinical signs of myocardial ischemia as there are:

- Pressure or tightness in the chest
- Pain in the chest, back, jaw
- Shortness of breath
- Sweating
- Nausea
- Vomiting
- Anxiety
- Cough

OR

Signs of ST-segment elevation/depression

a cardiologist will be consulted for further management.

## Patient privacy

All patients have to sign the written informed consent before they will be enrolled into the study. Patient privacy will be fully respected. Access to medical records is limited only to the study staff. Data will be managed by ID-number and stored pseudo-anonymously. The investigators and study coordinators are keenly aware of the increasing ethical concerns of using medical information in research and its potential misuse in clinical care. Data will be handled appropriately so that confidentiality is strictly maintained.

## Recruitment and Informed Consent

All patients will be recruited using the operation schedule the day before surgery. After meeting the eligibility criteria, the inclusion criteria will be checked. When a patient meets all criteria (eligibility and inclusion criteria) to participate in this trial he will be consented by a study staff physician latest at the day before surgery.

After written informed consent two copies will be made. One copy remains in the patient´s chart, another copy will be given to the patient. The original will be stored and remains by the principal investigator.

## Gender Aspects

Previous studies indicated no differences in the use of levosimendan between men and woman. Therefore, no differences between both sexes are expected in our trial either.

# Reporting Events

### Adverse (Drug) Reaction (ADR)

All noxious and unintended responses to a medical product related to any dose should be considered as an adverse drug reaction. „Responses“ to a medical product means that a causal relationship between a medical product and adverse event is at least a reasonable possibility, i.e., a relationship cannot be ruled out.

The following guidelines will be used to describe severity of the AE:

**Mild:** Events require minimal or no treatment and do not interfere with the participant´s daily activities.

**Moderate:** Events result in a low level of inconvenience or concern with the therapeutic measures. Moderate events may cause some interference with functioning.

**Severe:** Events interrupt a participant´s usual daily activity and may require systemic drug therapy or other treatment. Severe events are usually potentially life threatening or incapacitating. Of note, the term “severe” does not necessarily equate to “serious”.

### Suspected Unexpected Serious Adverse Reactions (SUSAR)

SUSARs are events that meet the following criteria:

- suspected to be causally associated with the study medication
- serious (as defined for an SAE)
- the nature or severity of the event is not consistent with the applicable reference safety information.

### Serious Adverse Events (SAE)

An adverse event or adverse reaction is considered serious if, it results in any of the following outcomes:

- Death
- A life-threatening experience
- A persistent or significant disability/incapacity
- A congenital anomaly/birth defect
- Requires hospitalization or prolongation of existing hospitalizations;

NOTE: Any hospital readmission with at least 1 overnight stay will be considered as an inpatient hospitalization. An emergency room visit without hospital admission will not be recorded as a SAE under this criterion, nor will hospitalization for a procedure scheduled or planned before signing of informed consent. However, unexpected complications and/or prolongation of hospitalization that occur during elective surgery should be recorded as adverse events and assessed for seriousness. Admission to the hospital for social or situational reasons (i.e. no place to stay, live too far away to come for hospital visits) will not be considered inpatient hospitalizations.

- An important medical event

Efficacy or safety outcomes will not be considered as SAEs, except if, because of the course or severity or any other feature of such events, the investigator, according to his/her best medical judgment, will consider these events as exceptional in this medical condition. All events considered as part of the primary, secondary, or exploratory outcomes (as described in 13.1 see Appendix I), should be reported on the appropriate page(s) in the case report form (CRF´s) but not as an SAE, unless considered exceptional in this medical condition. All adverse events will be recorded on the appropriate CRF.

Only unexpected and not previously described serious adverse events that are believed with a reasonable level of certainty to be associated with the trial medication need to be reported immediately (i.e. within 24 hours of knowledge of the event) to the sponsor of the study, the Medical University of Vienna. For such events research personal should complete an SAE CRF immediately. Research personnel in representation of the sponsor will then inform regulatory authorities in a timely manner. The data safety monitoring board (DSMB) will provide oversight of patients’ safety throughout the trial by reviewing unblinded aggregated data.

## Pregnancy

Female subjects in premenopausal period must have documented negative pregnancy test at date consenting.

## Data and Safety Monitoring Board

The following experienced researches will compromise the Data and Safety Monitoring Board (DSMB): Andrea Kurz, MD (Department of Outcomes Research and General Anesthesiology, Anesthesiology Institute, Cleveland Clinic); Gerd Silberhumer, MD (Department for Surgery, Medical University of Vienna, Medical University of Vienna); Eva Base, MD (Department of Anaesthesia, Intensive Care Medicine and Pain Medicine, Medical University of Vienna); Michael Wolzt, MD (Department of Clinical Pharmacology, Medical University of Vienna)

The DSMB will evaluate adverse events (AEs, SAEs, SUSARs, ADR) from 76 patients (38 per group) after all data are available. It will be the responsibility of this committee to alert the local ethics committee *via* letter to any harmful effects in one of the study groups. This committee, along with the local ethics committee will have the exclusive authority to stop the study either for futility, harm or clear benefit. Any morbidity potentially related to the study protocol will be reported to the ethics committee.

## Emergency Unblinding and Termination of the Study Drug

Emergency situations may require unblinding of treatment. As the treating physician (investigator) is responsible for the medical care provided to the trial participant, the decision to break to unblind the participant in emergency situations will lie solely with the investigator. The investigator may contact the DSMB to seek advice about unblinding. This should allow to reduce unblinding. If the primary investigator believes emergency unblinding is essential for the patient´s management then it can be undertaken. Only, if the primary investigator is not available a co-investigator will be contacted for emergency unblinding.

In the case of unblinding, the study drug will be discontinued. Blood samples will be continued according to the study protocol for safety reasons. Patients will not be dropped out because of intention to treat.

## Termination of the study

In the case of a preterminal termination of the study because of significant incidence of adverse events evaluated by the DSMB the sponsor will notify the competent authorities the end of the study including an appropriate justification. If the study will be terminated because of safety reasons the European Medicines Agency (EMA) will be notified as well.

## Adjudication of Trial Outcomes

Outcome adjudicators (a committee of clinicians with expertise in perioperative outcomes) who are blinded to treatment allocation will adjudicate the following outcomes: MINS, myocardial infarction, death. We will use the decisions of the outcome adjudicator for all statistical analysis of these events. Barbara Kabon, MD (Medical University of Vienna) and Giovanna Lurati, MD (University Düsseldorf, Germany) will chair the Adjudication Committee.

## Data Monitoring

The designated monitor (Thomas Hamp, MD) will contact and visit the Investigator on a regularly basis (begin, during and at the end of the trial) and will be allowed to have direct access to all source documents which are needed to verify all CRF and eCRF entries and other protocol-related documents provided that subject confidentiality is maintained in agreement with legal regulations. It will be the monitor´s responsibility to inspect the CRF´s and eCRF´s at regular intervals according to the monitoring plan throughout the study, to verify the adherence to the protocol and the completeness, consistency and accuracy of the that being entered on them. Further monitoring during the trials will be conducted after completing the data of every consecutive 10 participants.

## Direct access to source data/documents

According to the section 6 of the ICG-GCP guidelines we will provide and permit trial-related monitoring, audits, IRB review, regulatory inspections, direct access to source data/documents according to local authorities and the patient agreement.

## Other Management at the discretion of the attending physician

All aspects of the patient´s management are at the discretion of the attending physician whose judgment can overrule the study procedures at any time.

# Ethical and Legal Aspects

## Informed consent subjects

Following comprehensive instructions regarding the nature, significance, impact and risks of this clinical trial, the patient must give written consent to participate in the study.

During the instruction, the trial participants are to be made aware of the fact that they can withdraw their consent – without giving reasons – at any time without their further medical care being influenced in any way.

In addition to the comprehensive instructions given to the trial participants by the Investigator, the trial participants also receive a written patient information sheet in comprehensible language, explaining the nature and purpose of the study and its progress.

A study investigator will obtain informed consent from all patients.

## Ethical and good clinical practice (GCP)

The Investigator will ensure that this study is conducted in full conformance with the principles of the “Declaration of Helsinki” (as amended at the 64th WMA General Assembly, Fortaleza, Brazil, 2013) and with the laws and regulations of the country in which the clinical research is conducted.

The Investigator of the clinical trial shall guarantee that only appropriately trained personnel will be involved in the study. All studies must follow the ICH GCP Guidelines and the regulatory requirements. This trial follows the EU Directive embedded in the Austrian drug act.

## Acknowledgement / approval of the study

The Investigator will submit this protocol and any related document provided to the subject (such as subject information used to obtain informed consent) to an Ethics Committee (EC) or Institutional Review Board (IRB). Approval from the ethics committee must be obtained before starting the study.

The clinical trial will be performed in full compliance with the legal regulations according to the Drug Law (AMG - Arzneimittelgesetz) of the Republic of Austria.

An application must also be submitted to the Austrian Competent Authorities (Bundesamt für Sicherheit im Gesundheitswesen (BASG) represented by the Agency for Health and Food Safety (AGES Medizin Marktaufsicht) and registered to the European Clinical Trial Database (EudraCT) using the required forms. The timelines for (silent) approval set by national law must be followed before starting the study.

## Data Management and Safety

All hard-copy forms, such as CRFs, source data and informed consents will be stored in locked rooms within a secured area and is only accessible by investigators involved in the trial.

For electronic data management we will use the CLINCASE software (Quadratek, Berlin, Germany). Data storage and back up will be provided by IT Systems & Communications (ITSC) – IT4Science (Medical University of Vienna). Access to data is strictly controlled and will only be provided to the Sponsor (Medical University of Vienna), the study investigators, ethic commission (Ethic commission of the Medical University of Vienna) and if requested the Austrian Competent Authorities (Bundesamt für Sicherheit im Gesundheitswesen (BASG). Orion pharma will have no access to the data at any time.

All entries and changes in the CLINCASE software will be tracked.

Data will be stored after publishing of the trial and all of the substudies by Iron Mountain Austrian Archivierungs GmbH (Gewerbeparkstraße 3, 2282 Markgrafneusiedl)

## Quality assurance

To provide sufficient data quality all research personnel will undergo a training session prior to the trial initiation to ensure consistency in trial procedures including data collection and reporting. A detailed trial Manual of Operations will be available that will outline each step of the protocol.

## Dissemination policy

Results of this study are planned to be published in a peer review journal. The manuscript for publication will be the authors´ own work and professional writers are not intended to be involved.

We further intend to publish the study protocol in a peer review journal.

## Insurance

For this trial the sponsor (Medical University of Vienna) will provide an insurance corporation with Zürich Versicherung Aktiengesellschaft (Schwarzenbergplatz 15; 1010 Wien).

## Financing

The study drug, including preparation and labeling of levosimendan and placebo, will be provided by Orion Pharma (Orion Corporation, Espoo, Finland). Orion Pharma not involved in the protocol development and is whether involved in data analysis nor in manuscript publishing process of the main trial and of the substudies at any timepoint.

## Substudies

All substudies will not be part of the main protocol and the analysis and reporting of these substudies will be separate from the main study.

The trial protocol will be published in a peer-reviewed journal.

All substudies will be published separately from the main trial in a peer-reviewed journal.

# References

1. Weiser TG, Regenbogen SE, Thompson KD, et al. An estimation of the global volume of surgery: a modelling strategy based on available data. *Lancet* 2008; **372**: 139–44

2. Devereaux PJ, Sessler DI. Cardiac Complications in Patients Undergoing Major Noncardiac Surgery. *N Engl J Med* [Internet] 2015; **373**: 2258–69 Available from: http://www.nejm.org/doi/10.1056/NEJMra1502824

3. Smilowitz NR, Gupta N, Ramakrishna H, Guo Y, Berger JS, Bangalore S. Perioperative Major Adverse Cardiovascular and Cerebrovascular Events Associated With Noncardiac Surgery. *JAMA Cardiol* [Internet] 2017; **2**: 181–7 Available from: http://cardiology.jamanetwork.com/article.aspx?doi=10.1001/jamacardio.2016.4792

4. Devereaux PJ, Chan MT V, Alonso-Coello P, et al. Association between postoperative troponin levels and 30-day mortality among patients undergoing noncardiac surgery. *JAMA* [Internet] 2012; **307**: 2295–304 Available from: http://www.ncbi.nlm.nih.gov/pubmed/22706835

5. D.I. S, N.M. Z, G. M, et al. Period-dependent Associations between Hypotension during and for Four Days after Noncardiac Surgery and a Composite of Myocardial Infarction and Death: A Substudy of the POISE-2 Trial. *Anesthesiology* 2018; **128**: 317–27

6. Abbott TEF, Pearse RM, Archbold RA, et al. A Prospective International Multicentre Cohort Study of Intraoperative Heart Rate and Systolic Blood Pressure and Myocardial Injury After Noncardiac Surgery: Results of the VISION Study. *Anesth Analg* 2018; **126**: 1936–45

7. Rodseth RN, Biccard BM, Chu R, et al. Postoperative B-type natriuretic peptide for prediction of major cardiac events in patients undergoing noncardiac surgery: systematic review and individual patient meta-analysis. *Anesthesiology* [Internet] 2013; **119**: 270–83 Available from: http://www.ncbi.nlm.nih.gov/pubmed/23528538

8. Kopec M, Duma A, Helwani MA, et al. Improving prediction of postoperative myocardial infarction with high-sensitivity cardiac troponin T and NT-proBNP. *Anesth Analg* 2017; **124**: 398–405

9. Zois NE, Bartels ED, Hunter I, Kousholt BS, Olsen LH, Goetze JP. Natriuretic peptides in cardiometabolic regulation and disease. *Nat Rev Cardiol* [Internet] Nature Publishing Group; 2014; **11**: 403–12 Available from: http://dx.doi.org/10.1038/nrcardio.2014.64

10. Abassi Z, Karram T, Ellaham S, Winaver J, Hoffman A. Implications of the natriuretic peptide system in the pathogenesis of heart failure: Diagnostic and therapeutic importance. *Pharmacol Ther* 2004; **102**: 223–41

11. Rodseth RN, Biccard BM, Le Manach Y, et al. The prognostic value of pre-operative and post-operative B-type natriuretic peptides in patients undergoing noncardiac surgery: B-type natriuretic peptide and N-terminal fragment of pro-B-type natriuretic peptide: A systematic review and individual patien. *J Am Coll Cardiol* 2014; **63**: 170–80

12. Duceppe E, Parlow J, MacDonald P, et al. Canadian Cardiovascular Society Guidelines on Perioperative Cardiac Risk Assessment and Management for Patients Who Undergo Noncardiac Surgery. *Can J Cardiol* [Internet] Canadian Cardiovascular Society; 2017; **33**: 17–32 Available from: http://dx.doi.org/10.1016/j.cjca.2016.09.008

13. Devereaux PJ, Biccard BM, Sigamani A, et al. Association of postoperative high-sensitivity troponin levels with myocardial injury and 30-day mortality among patients undergoing noncardiac surgery. *JAMA - J Am Med Assoc* 2017; **317**: 1642–51

14. Tritapepe L, De Santis V, Vitale D, et al. Levosimendan pre-treatment improves outcomes in patients undergoing coronary artery bypass graft surgery. *Br J Anaesth* [Internet] British Journal of Anaesthesia; 2009; **102**: 198–204 Available from: http://dx.doi.org/10.1093/bja/aen367

15. Levin R, Degrange M, Del Mazo C, Tanus E, Porcile R. Preoperative levosimendan decreases mortality and the development of low cardiac output in high-risk patients with severe left ventricular dysfunction undergoing coronary artery bypass grafting with cardiopulmonary bypass. *Exp Clin Cardiol* 2012; **17**: 125–30

16. Eris C, Yavuz S, Toktas F, et al. Preoperative usages of levosimendan in patients undergoing coronary artery bypass grafting. *Int J Clin Exp Med* 2014; **7**: 219–29

17. Mehta RH, Leimberger JD, van Diepen S, et al. Levosimendan in Patients with Left Ventricular Dysfunction Undergoing Cardiac Surgery. *N Engl J Med* 2017; **376**: 2032–42

18. Cholley B, Caruba T, Grosjean S, et al. Effect of Levosimendan on Low Cardiac Output Syndrome in Patients With Low Ejection Fraction Undergoing Coronary Artery Bypass Grafting With Cardiopulmonary Bypass. *Jama* 2017; **318**: 548

19. Putzu A, Clivio S, Belletti A, Cassina T. Perioperative levosimendan in cardiac surgery: A systematic review with meta-analysis and trial sequential analysis. *Int J Cardiol* [Internet] Elsevier B.V.; 2018; **251**: 22–31 Available from: https://doi.org/10.1016/j.ijcard.2017.10.077

20. Iwanaga Y, Nishi I, Furuichi S, et al. B-type natriuretic peptide strongly reflects diastolic wall stress in patients with chronic heart failure: Comparison between systolic and diastolic heart failure. *J Am Coll Cardiol* [Internet] Elsevier Masson SAS; 2006; **47**: 742–8 Available from: http://dx.doi.org/10.1016/j.jacc.2005.11.030

21. Egom EE. BNP and Heart Failure: Preclinical and Clinical Trial Data. *J Cardiovasc Transl Res* 2015; **8**: 149–57

22. Van Veldhuisen DJ, Linssen GCM, Jaarsma T, et al. B-type natriuretic peptide and prognosis in heart failure patients with preserved and reduced ejection fraction. *J Am Coll Cardiol* Elsevier Inc.; 2013; **61**: 1498–506

23. Mak GS, DeMaria A, Clopton P, Maisel AS. Utility of B-natriuretic peptide in the evaluation of left ventricular diastolic function: Comparison with tissue Doppler imaging recordings. *Am Heart J* 2004; **148**: 895–902

24. Mahadavan G, Nguyen TH, Horowitz JD. Brain natriuretic peptide: a biomarker for all cardiac disease? *Curr Opin Cardiol* [Internet] 2014; **29**: 160–6 Available from: http://content.wkhealth.com/linkback/openurl?sid=WKPTLP:landingpage&an=00001573-201403000-00008

25. Mebazaa A, Nieminen M, Packer M, et al. Levosimendan vs Dobutamine for Patients. *JAMA* 2007; **297**: 1883–91

26. Devereaux PJ, Szczeklik W. Myocardial injury after non-cardiac surgery: diagnosis and management. *Eur Heart J* 2019; **0**: 1–9

27. Thygesen K, Alpert JS, Jaffe A, et al. Universal definition of myocardial infarction (2018). *Circulation* 2019; 237–69

28. Südfeld S, Brechnitz S, Wagner JY, et al. Post-induction hypotension and early intraoperative hypotension associated with general anaesthesia. *Br J Anaesth* 2017; **119**: 57–64

29. Salmasi V, Maheshwari K, Yang D, et al. Thresholds , and Acute Kidney and Myocardial Injury after Noncardiac Surgery A Retrospective Cohort Analysis. *Anesthesiology* 2017; **126**: 47–65

30. Feldheiser A, Pavlova V, Bonomo T, et al. Balanced crystalloid compared with balanced colloid solution using a goal-directed haemodynamic algorithm. *Br J Anaesth* [Internet] The Author(s); 2012; **110**: 231–40 Available from: http://dx.doi.org/10.1093/bja/aes377

31. Roshanov P, Rochwerg B, Patel A, et al. Withholding versus Continuing Angiotensin-converting Enzyme Inhibitors or Angiotensin II Receptor Blockers before Noncardiac Surgery An Analysis of the Vascular events In noncardiac Surgery patIents cOhort evaluatioN Prospective Cohort. *Anesthesiology* 2017; 16–27

32. C. J, B.W. T. Group Sequential Methods with Applications to Clinical Trials. New York; 1999.

33. Khanna AK, Maheshwari K, Mao G, et al. Association between Mean Arterial Pressure and Acute Kidney Injury and a Composite of Myocardial Injury and Mortality in Postoperative Critically Ill Patients: A Retrospective Cohort Analysis. *Crit Care Med* 2019; **47**: 910–7

34. Devereaux PJ, Biccard BM, Sigamani A, et al. Association of postoperative high-sensitivity troponin levels with myocardial injury and 30-day mortality among patients undergoing noncardiac surgery. *JAMA - J Am Med Assoc* 2017; **317**: 1642–51

35. Maheshwari K, Turan A, Mao G, et al. The association of hypotension during non-cardiac surgery, before and after skin incision, with postoperative acute kidney injury: a retrospective cohort analysis. *Anaesthesia* 2018; **73**: 1223–8

36. Nieminen MS, Akkila J, Hasenfuss G, et al. Hemodynamic and neurohumoral effects of continuous infusion of levosimendan in patients with congestive heart failure. *J Am Coll Cardiol* [Internet] Elsevier Masson SAS; 2000; **36**: 1903–12 Available from: http://dx.doi.org/10.1016/S0735-1097(00)00961-X

37. Thygesen K, Alpert JS, Jaffe AS, et al. Fourth universal definition of myocardial infarction (2018). *Eur Heart J* 2019; **40**: 237–69

38. Kirchhof P, Benussi S, Zamorano JL, et al. 2016 ESC guidelines for the management of atrial fibrillation developed in collaboration with EACTS. *Eur Heart J* 2016; **37**: 2893–962

39. Hou GC, Gan H, Sun XL, Li J. Use of body composition measurements to guide the assessment of dry weight in anuric dialysis patients: improvements in blood pressure control. *Biochem Biophys Reports* [Internet] Elsevier B.V.; 2019; **17**: 191–6 Available from: https://doi.org/10.1016/j.bbrep.2019.01.005

40. Zarbock A, Koyner JL, Hoste EAJ, Kellum JA. Update on perioperative acute kidney injury. *Anesth Analg* 2018; **127**: 1236–45

41. Hoste EAJ, Bagshaw SM, Cely CM, et al. Epidemiology of acute kidney injury in critically ill patients : the multinational AKI-EPI study Hospital mortality. *Intensive Care Med* 2015; **41**: 1411–23

42. Lannemyr L, Ricksten SE, Rundqvist B, et al. Differential effects of levosimendan and dobutamine on glomerular filtration rate in patients with heart failure and renal impairment: A randomized double-blind controlled trial. *J Am Heart Assoc* 2018; **7**: 1–9

43. Devereaux PJ, Yang H, Yusuf S, et al. Effects of extended-release metoprolol succinate in patients undergoing non-cardiac surgery (POISE trial): A randomised controlled trial. *Lancet* 2008; **371**: 1839–47

44. Mackey WC, Fleisher LA, Haider S, et al. Perioperative myocardial ischemic injury in high-risk vascular surgery patients: Incidence and clinical significance in a prospective clinical trial. *J Vasc Surg* 2006; **43**: 533–8

45. Santonocito C, De Loecker I, Donadello K, et al. C-reactive protein kinetics after major surgery. *Anesth Analg* 2014; **119**: 624–9

46. Rettig TCD, Verwijmeren L, Dijkstra IM, Boerma D, Van De Garde EMW, Noordzij PG. Postoperative interleukin-6 level and early detection of complications after elective major abdominal surgery. *Ann Surg* 2016; **263**: 1207–12

47. Kaptoge S, Seshasai SRK, Gao P, et al. Inflammatory cytokines and risk of coronary heart disease: New prospective study and updated meta-analysis. *Eur Heart J* 2014; **35**: 578–89

48. Kaptoge S, Di Angelantonio E, Lowe G, et al. C-reactive protein concentration and risk of coronary heart disease, stroke, and mortality: An individual participant meta-analysis. *Lancet* 2010; **375**: 132–40

49. Ridker PM, Lüscher TF. Anti-inflammatory therapies for cardiovascular disease. *Eur Heart J* 2014; **35**: 1782–91

50. Ridker PM, MacFadyen JG, Everett BM, et al. Relationship of C-reactive protein reduction to cardiovascular event reduction following treatment with canakinumab: a secondary analysis from the CANTOS randomised controlled trial. *Lancet* 2018; **391**: 319–28

51. Ridker PM, Libby P, MacFadyen JG, et al. Modulation of the interleukin-6 signalling pathway and incidence rates of atherosclerotic events and all-cause mortality: Analyses from the Canakinumab Anti-Inflammatory Thrombosis Outcomes Study (CANTOS). *Eur Heart J* 2018; **39**: 3499–507

52. Krychtiuk KA, Watzke L, Kaun C, et al. Levosimendan exerts anti-inflammatory effects on cardiac myocytes and endothelial cells in vitro. *Thromb Haemost* 2015; **113**: 350–62

53. Rodríguez-González R, Pollesello P, Baluja A, Álvarez J. Effects of Levosimendan on Inflammation and Oxidative Stress Pathways in a Lipopolysaccharide-Stimulated Human Endothelial Cell Model. *Biol Res Nurs* 2019; **21**: 466–72

54. Kyrzopoulos S, Adamopoulos S, Parissis JT, et al. Levosimendan reduces plasma B-type natriuretic peptide and interleukin 6, and improves central hemodynamics in severe heart failure patients. *Int J Cardiol* 2005; **99**: 409–13

55. Trikas A, Antoniades C, Latsios G, et al. Long-term effects of levosimendan infusion on inflammatory processes and sFas in patients with severe heart failure. *Eur J Heart Fail* 2006; **8**: 804–9

56. Parissis JT, Adamopoulos S, Farmakis D, et al. Effects of serial levosimendan infusions on left ventricular performance and plasma biomarkers of myocardial injury and neurohormonal and immune activation in patients with advanced heart failure. *Heart* 2006; **92**: 1768–72

# APPENDIX

## 15.1 Appendix I: Definition of Perioperative Complications

### 15.1.1 Heart failure requiring medical intervention

New onset of acute heart failure requiring medical intervention with one or more of the following drugs: dobutamine, dopamine, epinephrine, milrinone. Furthermore, also treatment with a venous-arterial extracorporeal membrane oxygenation device (ECMO).

### 15.1.2 Myocardial infarction

The fourth universal definition of myocardial infarction 201837 will be used to define MI as follows:

MI is an acute myocardial injury with clinical evidence of acute myocardial ischemia and with detection of a rise and / or fall of cTnT values with at least one value above the 99th percentile upper reference limit (URL) and at least one of the following:

1. Symptoms of myocardial ischemia;(new ischemic ECG changes; (new or presumed ECG changes indicative of ischemia (i.e., ST segment elevation [≥ 2 mm in leads V1, V2, or V3 OR ≥ 1 mm in the other leads], ST segment depression [≥ 1 mm], or symmetric inversion of T waves ≥ 1 mm) in at least two contiguous leads; new LBBB)
2. Development of pathological Q waves;
3. Imaging evidence of new loss of viable myocardium or new regional wall motion abnormality in pattern consistent with an ischemic etiology.
4. Identification of a coronary thrombus by angiography or autopsy

### 15.1.3 Life threating bleeding

Life-threatening bleeding is bleeding that is fatal, or leads to: significant hypotension that requires inotrope therapy, urgent (within 24 hours) surgery (other than superficial vascular repair), or intracranial hemorrhage.

### 15.1.4 New onset of atrial fibrillation

Artrial Fibrillation will be diagnosed according to the management guidelines for atrial fibrillation published by the European Society for Cardiology (ESC).38

AF requires a rhythm documentation using an ECG showing the typical pattern of AF: Absolutely irregular RR intervals and no discernible, distinct P waves. Duration of the episode should at least be 30 seconds.

### 15.1.5 Sepsis

Presence of two or more of the following findings: body temperature < 38°C or > 38°C, heart rate > 90 beats per minute respiratory rate > 20 breath per minute, or, PaCO2 < 32 mmHg; WBC count < 4,000 cells/mm3 or > 12,000 cells/mm3 or > 10% band forms *PLUS*

a confirmed infectious process; infection can be suspected or proven (positive culture, stain, or polymerase chain reaction), a clinical syndrome pathognomonic for infection, such as abnormal chest x-rays consistent with pneumonia, petechiae, purpura, or purpura fulminans; OR

development of organ failure requiring e.g. renal replacement therapy, respiratory failure needing invasive support, refractory hypotension requiring significant vasopressor support, every kind of extracorporeal membrane oxygenation device.

### 15.1.6 Stroke / TIA

Stroke is defined as a new focal neurological deficit thought to be vascular in origin with signs or symptoms lasting more than 24 hours or leading to death. Stroke will be sub-classified into hemorrhagic and non-hemorrhagic stroke. Classification are based on the tests ordered by the attending neurologists/physician. CT or MRI will also be used for outcome classification.

### 15.1.7 Pulmonary embolism

To diagnose symptomatic PE any of the following symptoms are required:

- - 1. High probability ventilation/perfusion lung scan
    2. Intraluminal filling defect of segmental or larger artery on the spiral CT scan,
    3. Intraluminal filling defect on pulmonary angiography
    4. Positive test for DVT

Diagnosis will be done by the attending physician. Test results will be used for outcome classification.

### 15.1.8 Unplanned ICU admission

Defined as admission on ICU at least 24 hours after surgery due to hemodynamic, respiratory, cardiovascular or septic events.

### 15.1.9 Death

Death is defined as any with vascular cause or cardiac cause, including myocardial infarction, cardiac arrest, stroke, fatal pulmonary embolus, hemorrhage and multi-organ failure.

## 15.2 Appendix II: Sub-study I: Body Composition Monitor

### 15.2.1 Background

The Body Composition Monitor (BCM) determines individual fluid status and body composition noninvasively, using bioimpedance spectroscopy. The BCM monitor is able to assess the following clinically relevant parameters:

1. Quantification of fluid status: a) overhydration (OH)

b) total body water and (TBW)

2. Assessment of body composition: a) lean tissue mass

b) adipose tissue mass

50 frequencies over a range from 5 to 1000 kHz were used to determine the electrical resistance of total body water (TBW) and extracellular water (ECW). While high-frequency current passes through the total body water, low-frequency current is not able to penetrate cell membranes and thus flows exclusively through the extracellular water.

The BCM Monitor provides accurate measurement of total body water (TBW) which has been validated against gold standard methods. As TBW is equivalent to the urea distribution volume (V), there is no need for time consuming kinetic urea modelling or anthropometric equations which can produce erroneous results in extremes of body composition. In patients receiving

In clinical practice BCM was successfully implemented for optimization for renal replacement therapy in patient with end-stage renal disease.39

However, there is scarce evidence in patients undergoing noncardiac surgery.

There is no data available regarding the fluid status and body composition during first determined with the BCM technique. Assuming that levosimendan improve postoperative cardiac output and thus might positively affect renal function, we expect a significantly decreased in TBW in patients assigned to the levosimendan group.

We will quantify the fluid status and assess body composition during the study period. Therefore, we will measure the fluid status before and within 2 hours after surgery, on postoperative day one, two and three.

### 15.2.2 BCM Measurement

For BCM measurement the following steps are required: 1. Electrodes are attached to one hand and one foot with the patient in supine position. 2. Patient cable will be connected. 3. Measurement is initiated, and results will be displaced within 2 minutes. 4. Results will be stored on the PatientCard. 5. Finally data will be transferred via the PatientCard to a study computer for further analysis using the Fluid Management Tool (FMT).

The following parameters will be evaluated with each measurement: 1) Overhydration, 2) Lean tissue index, 3) Fat tissue index, 4) Total Body Water, 5) Extracellular water (ECW), 6) Intracellular Water (ICW), 7) ECW/ICW, 8) Lean tissue mass, 9) Fat mass, 10) Adipose tissue mass, 11) Body cell mass.

### 15.2.3 Primary Aim

The administration of levosimendan decrease the number of patients suffering from postoperative overhydration during the first three postoperative days. A patient is considered as overhydrated, when on at least one measurement the overhydration exceed 1L.

Incidence of overhydration will be evaluated 24-30 hours after start of surgery, on postoperative day 2 and postoperative day 3. Measurements will be performed preoperative and postoperative measurements will be performed 9:00 and 12:00 am on the first, second and third postoperative day.

### 15.2.4 Secondary Aim

Comparison of the AUC of the total body water between both study groups. Lean tissue index, fat tissue index, total body water, extracellular water (ECW), intracellular water (IWC), ECW/ICW, lean tissue mass, fat mass, adipose tissue mass, body cell mass; between both study groups.

### 15.2.5 Statistical Analysis

The primary outcome, the number of overhydrated patients between both study groups, will be analyzed using a chi-square test.

The secondary outcome, AUC of TBW between both study groups, will be analyzed using a student´s t-test or a Mann-Whitney-U test depending on the distribution of the data.

## 15.3 Appendix III: Sub-study II: Renal Function

### 15.3.1 Background

Acute kidney injury (AKI) is a common condition in the perioperative period and is defined as a marked decline of renal function occurring within a few hours or days.40 Even mild changes in kidney function, as assessed by serum creatinine (SCr), urine output, or both seem to be associated with increased short-and long-term adverse outcomes. A standard definition and staging system for AKI has been developed, incorporating a reduction of the urine output and/or an increase of serum creatinine.

Patients who were older, having a history of heart failure, hypertension, diabetes, or cirrhosis were more likely to develop AKI.41 A maximum AKI severity of KDIGO stage 1 occurred in 331 patients (18.4 %; 95 % CI 16.7–20.2), KDIGO stage 2 in 161 patients (8.9 %; 95 % CI 7.7–10.3), and KDIGO stage 3 in 540 patients (30.0 %; 95 % CI 27.9–32.1). There was a stepwise increase in mortality with

increasing AKI severity [KDIGO stage 1: odds ratio (OR) 2.19; 95 % CI 1.44–3.35, KDIGO stage 2: OR 3.88; 95 % CI 2.42–6.21, and KDIGO stage 3: OR 7.18; 95 % CI 5.13–10.04]. When adjusted for other variables that may explain mortality, KDIGO stage 2 (OR 2.945; 95 % CI 1.382–6.276; p = 0.005) and KDIGO stage 3 (OR 6.884; 95 % CI 3.876–12.228; p\0.001) were still associated with increased in-hospital mortality.41

A small randomized trial including 32 patients with chronic heart failure and renal impairment, levosimendan increases glomerular filtration rate to a greater extent than dobutamine. There was a 20% increase of GFR in patients after a single infusion of levosimendan.42 (Figure 1/III)


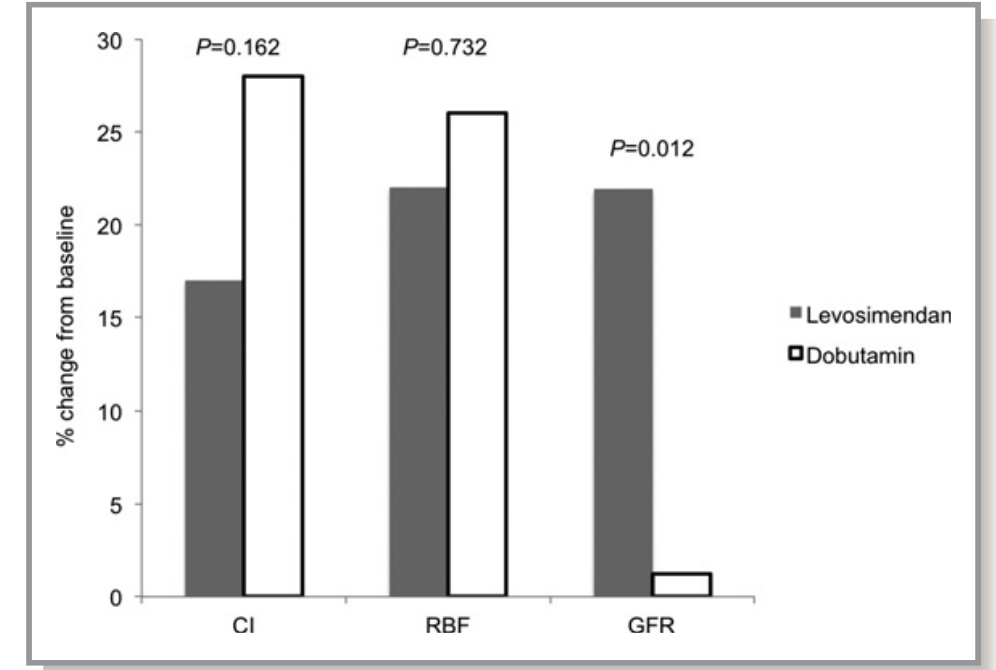


Figure 1/III42

Because of the lacking evidence regarding the effect of levosimendan on perioperative renal function specifically in patients with increased cardiac risks undergoing noncardiac surgery, we want to evaluate in this sub-study the effect of a preemptive administration of a single-dose levosimendan in these patient population.

### 15.3.2 Primary Aim

The preemptive administration of levosimendan decrease the postoperative number of patients suffering from AKI evaluated during the first three postoperative days. All patients will be classified according to the KDIGO criteria as follows:


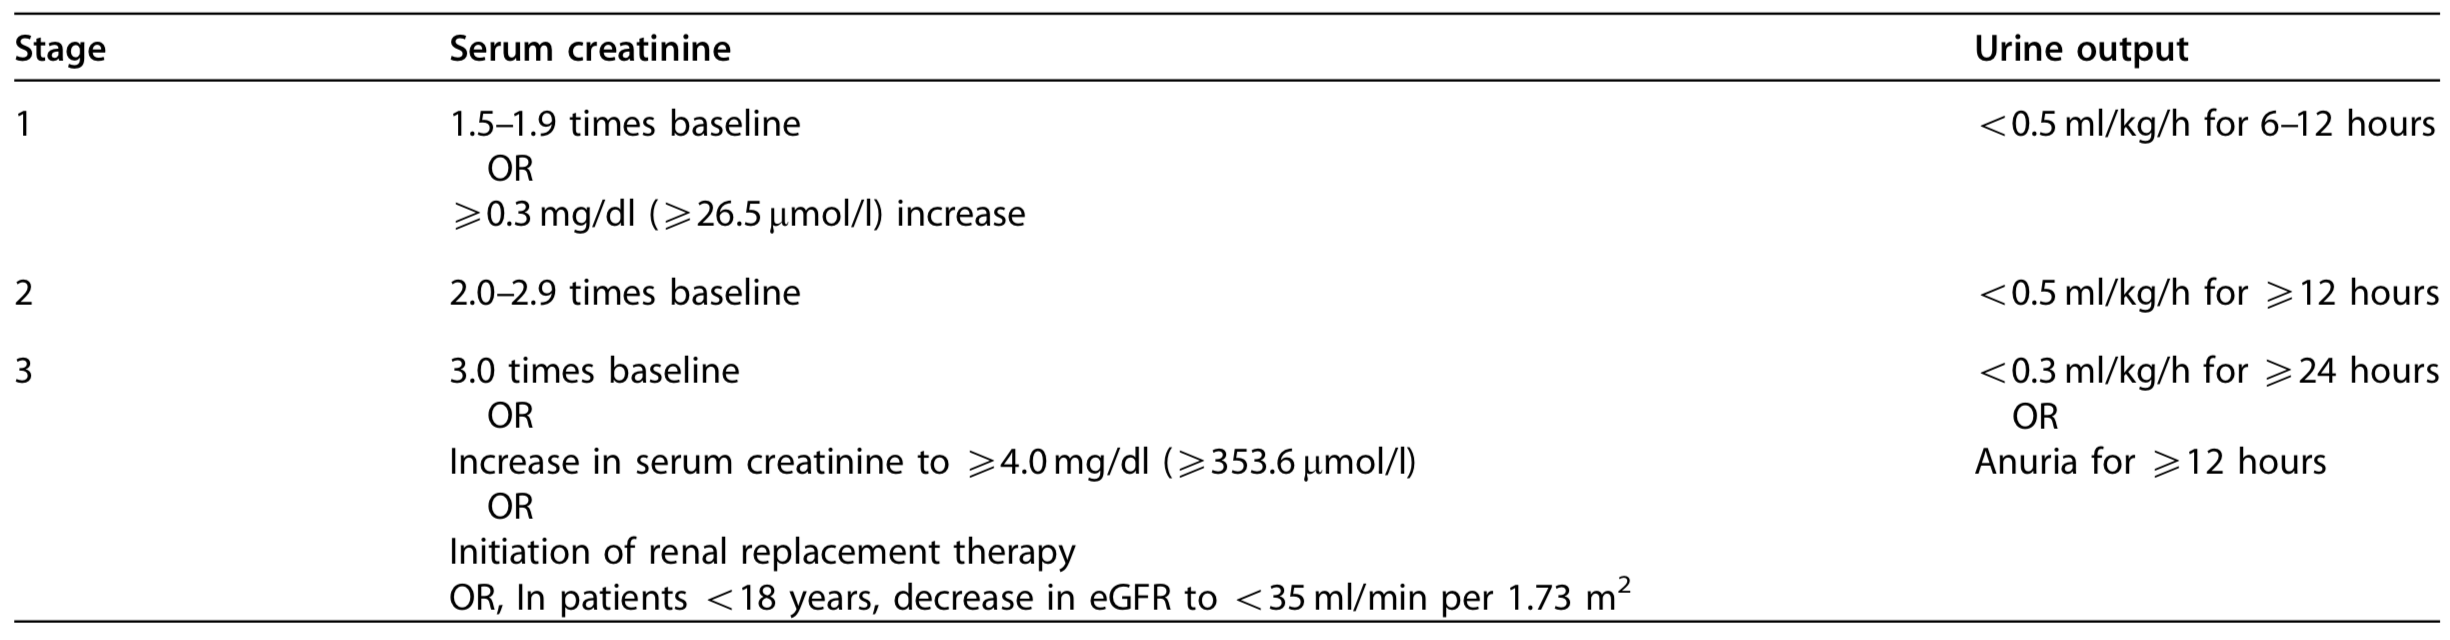


Renal measurements including serum creatinine, estimated glomerular filtration rate (eGFR) and urine output (according to the patient chart records) will performed on the first, second and third postoperative day.

### 15.3.3 Secondary Aim

We will further evaluate the number of patients needing postoperative renal replacement therapy (RRT) during the first three postoperative days. Decision regarding the need of a RRT will be at the discretion of the responsible physician.

## 15.4 Appendix IV: Sub-study III: Inflammatory Response

### 15.4.1 Background

Myocardial ischemic injury is the most common perioperative major vascular complication in patients undergoing noncardiac surgery.43 44 There is a significant increase of inflammatory parameters after surgery as compared to preoperative baseline values.45 46

Initiation and progress of arteriosclerotic lesions is one of the main causes of cardiovascular events, which might be partially mediated by inflammation.47 Increased pro-inflammatory cytokines like C-reactive protein (CRP) and Interleukin-6 (IL-6) are associated with the incidence of coronary heart disease.47–49 Interestingly, the selective neutralization of Interleukin 1β (IL-1β) with Canakinumab in patients after myocardial infarction significantly reduced the incidence of recurrent cardiovascular events and cardiovascular death.50 51 This was explained by the decreased inflammatory response in those patients receiving Canakinumab.50 51

The effect of inflammation on the incidence of cardiovascular events, specifically in patients undergoing noncardiac surgery is still lacking. Postoperative IL-6 concentration was shown to be an independent predictor for postoperative cardiovascular complications in patients with increased cardiac risk factors.46 In an experimental setting, Levosimendan significantly decreases IL-1β induced expression of IL-6 in human cardiac myocytes and human endothelial cells.52 53 Moreover, the administration of Levosimendan significantly reduced serum IL-6 and CRP levels in patients with severe heart failure.54–56

**Figure 1/IV**


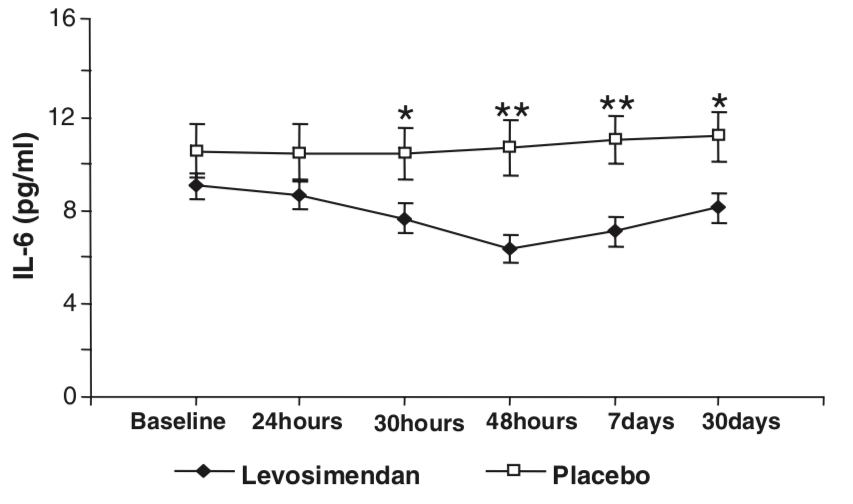


Figure 1/IV: Effects of Levosimendan on Interleukin-6 serum levels in patients with severe heart failure. Values expressed as means ±SEM. *p<0.05 and **p<0.01 for Placebo (n=11) vs. Levosimendan (n=16)56

The effect of Levosimendan to attenuate the inflammatory response in patients undergoing noncardiac surgery still remains unclear. Therefore, the aim of this sub-study is to evaluate the anti-inflammatory effect of Levosimendan specifically in patients with increased cardiac risk factors undergoing moderate- to high-risk noncardiac surgery. Specifically, we assume a significant lower IL-6 plasma concentration in patients receiving levosimendan.

### 15.4.2 Aim

Our primary outcome is the effect of Levosimendan on the maximum postoperative IL-6 plasma concentration.

### 15.4.3 Secondary Aims

1. We will evaluate the difference in the maximum postoperative CRP plasma concentration between both study groups.
2. We further evaluate the correlation between inflammation (determined by IL-6 and CRP plasma concentration) and MINS (determined by TnT measurements).13 Patients with an IL-6 plasma concentration > 432 pg/dL were more prone to develop cardiovascular events after surgery as compared to patients with an IL-5 concentration below 432 pg/dL.46 Therefore, we will stratify patients according their maximum postoperative IL-6 concentration into a high-risk (>432 pg/dL) and a low-risk group (<432 pg/dL).

Maximum postoperative IL-6 is defined as the highest detected concentration within 2 hours after surgery, on the first, second and third postoperative day.

All laboratory parameters will be determined before anesthesia, within 2 hours after surgery and on the first, second and third postoperative day.

### 15.4.4 Statistical Analysis

In order to evaluate our primary outcome, the difference of maximum postoperative IL-6 plasma concentration, we will use a 2-sample two-tailed Mann-Whitney-U test.

For our secondary outcome, the effect of Levosimendan on maximum postoperative CRP plasma concentration, a 2-sample two-tailed Mann-Whitney-U test will be performed. The difference of the incidence of MINS between the high-risk and the low-risk group will be analyzed using a Chi-square test.

| ***Timepoints*** | | ***Enrollment*** | | ***Intervention*** | |  | ***Postoperative Period*** | | | | | ***Phone Follow-Up*** | |
| --- | --- | --- | --- | --- | --- | --- | --- | --- | --- | --- | --- | --- | --- |
|  | | preoperative  visit | before  anaesthesia | during surgery | after surgery  within 2 hours | after surgery within 24 hours | POD 1 | POD 2 | POD 3 | POD 5 | hospital discharge | 30 days after surgery | 1 year after surgery |
|  | ***Enrollment*** | | | | | | | | | | | | |
| Eligibility Screening | | X |  |  |  |  |  |  |  |  |  |  |  |
| Informed Consent | | X |  |  |  |  |  |  |  |  |  |  |  |
| Patient History | | X |  |  |  |  |  |  |  |  |  |  |  |
| Blood Pressure  Measurement | |  | X |  |  |  |  |  |  |  |  |  |  |
| Allocation | |  | X |  |  |  |  |  |  |  |  |  |  |
|  | ***Intervention*** | | | | | | | | | | | | |
| Blinded Drug Treatment | |  |  | X |  |  |  |  |  |  |  |  |  |
| Study Drug infusion | |  |  | X | X | X |  |  |  |  |  |  |  |
| Hemodynamic Records | |  |  | X | X | X |  |  |  |  |  |  |  |
| SAE & AE | |  |  | X | X | X |  |  |  |  |  |  |  |
|  | ***Assessments*** | | | | | | | | | | | | |
| Outcomes (see Appendix IV) | |  |  |  |  |  | X | X | X | X |  |  |  |
| SAE & AE | |  |  |  |  |  | X | X | X | X | X |  |  |
|  | ***Follow-Up*** | | | | | | | | | | | | |
| 30 day Phone F/U | |  |  |  |  |  |  |  |  |  |  | X |  |
| 1 Year Phone F/U | |  |  |  |  |  |  |  |  |  |  |  | X |
|  | ***Sub-study I: Body Composition Monitor (see Appendix II)*** | | | | | | | | | | | | |
| Primary Outcome – BCM measurements | |  | X |  |  | X | X | X | X |  |  |  |  |
|  | ***Sub-study II: Renal Function (see Appendix III)*** | | | | | | | | | | | | |
| AKI evaluation | |  | X |  |  |  | X | X | X | X |  |  |  |
| RRT Evaluation | |  |  |  |  |  |  |  |  |  | X |  |  |
|  | ***Sub-study III: Inflammatory Response (see Appendix IV)*** | | | | | | | | | | | | |
| Primary Outcome –  Inflammatory parameters | |  | X |  | X |  | X | X | X | X |  |  |  |

## 15.5 Appendix IV: Time Schedule

## 15.6 Appendix V: Study specific laboratory measurements

|  | ***Preoperative***  ***(Baseline)*** | ***Postoperative*** | | | | |
| --- | --- | --- | --- | --- | --- | --- |
|  | 0 | 0 (immediately after surgery within 2 hrs) | POD 1 | POD 2 | POD 3 | POD 5 |
| BNP | X | X | X | X | X | X |
| TnT | X | X | X | X | X | X |
| Copeptin | X | X | X | X | X | X |
| Creatinine | X | X | X | X | X | X |
| Hematology | X |  |  |  |  |  |
| Chemistry2) | X | X | X | X | X | X |
| Creatinine1) | X | X | X | X | X | X |
| eGFR1) | X | X | X | X | X | X |
| IL-62) | X | X | X | X | X | X |
| ***Blood Volume***  ***(max)*** | ***30mL*** | ***10mL*** | ***10mL*** | ***10mL*** | ***10mL*** | ***10 mL*** |

1) Appendix III, Renal Function – Sub-Study

2) Appendix IV, Inflammatory Response – Sub-Study

## 15.7 Appendix VI: WHODAS 2.0

| Wie viele Schwierigkeiten hatten Sie in den letzten 30 Tagen: | | | | | | |
| --- | --- | --- | --- | --- | --- | --- |
| S1 | Eine längere Zeit (ca. 30 Minuten) zu stehen? | Keine  (0) | Geringe (1) | Mäßige (2) | Starke (3) | Sehr starke/nicht möglich (4) |
| S2 | Ihren Haushaltspflichten nachzukommen? | Keine  (0) | Geringe (1) | Mäßige (2) | Starke (3) | Sehr starke/nicht möglich (4) |
| S3 | Neue Aufgaben zu lernen (zB erlernen an einem neuen Ort zu gelangen, den Sie nicht kannten) | Keine  (0) | Geringe (1) | Mäßige (2) | Starke (3) | Sehr starke/nicht möglich (4) |
| S4 | Wie viele Schwierigkeiten hatten Sie, an gesellschaftlichen Aktivitäten (wie zB Festlichkeiten, religiöse oder andere Aktivitäten) in der gleichen Art und Weise teilzunehmen, wie jeder andere? | Keine  (0) | Geringe (1) | Mäßige (2) | Starke (3) | Sehr starke/nicht möglich (4) |
| S5 | Wie sehr wurden Sie durch Ihren gesundheitlichen Zustand emotional belastet? | Keine  (0) | Geringe (1) | Mäßige (2) | Starke (3) | Sehr starke/nicht möglich (4) |
| S6 | Sich für 10 Minuten auf etwas zu konzentrieren? | Keine  (0) | Geringe (1) | Mäßige (2) | Starke (3) | Sehr starke/nicht möglich (4) |
| S7 | Eine längere Strecke (ca. einen Kilometer) zu Fuss zu gehen? | Keine  (0) | Geringe (1) | Mäßige (2) | Starke (3) | Sehr starke/nicht möglich (4) |
| S8 | Ihren gesamten Körper zu waschen? | Keine  (0) | Geringe (1) | Mäßige (2) | Starke (3) | Sehr starke/nicht möglich (4) |
| S9 | Sich anzuziehen? | Keine  (0) | Geringe (1) | Mäßige (2) | Starke (3) | Sehr starke/nicht möglich (4) |
| S10 | Im Umgang mit Personen, die Sie nicht kennen? | Keine  (0) | Geringe (1) | Mäßige (2) | Starke (3) | Sehr starke/nicht möglich (4) |
| S11 | Eine Freundschaft aufrechtzuerhalten? | Keine  (0) | Geringe (1) | Mäßige (2) | Starke (3) | Sehr starke/nicht möglich (4) |
| S12 | Bei der Bewältigung Ihres Arbeits/Schulalltags? | Keine  (0) | Geringe (1) | Mäßige (2) | Starke (3) | Sehr starke/nicht möglich (4) |

| **Summe** | ……………………… |
| --- | --- |

| H1 | An wie vielen Tage traten diese Schwierigkeiten während der letzten 30 Tage auf? | Anzahl der Tage …………… |
| --- | --- | --- |
| H2 | An wie vielen Tagen in den letzten 30 Tagen waren Sie aufgrund Ihrer Gesundheitsprobleme absolut unfähig, alltägliche Aktivitäten oder Ihre Arbeit zu verrichten? | Anzahl der Tage …………… |
| H3 | An wie vielen Tagen in den letzten 30 Tagen mussten Sie aufgrund Ihrer Gesundheitsprobleme alltägliche Aktivitäten oder Ihre Arbeit reduzieren? | Anzahl der Tage …………… |

## 15.8 Appendix VII: Definitions of surgeries

***Major general surgery*** – A patient undergoing one or more of the following general surgeries: complex visceral resection, partial or total colectomy or stomach surgery, other intra-abdominal surgery, major hepato-biliary surgery, pancreatic surgery.

***Major urology or gynecology surgery*** – A patient undergoing one or more of the following major urology or gynecology surgeries: nephrectomy, ureterectomy, bladder resection, retroperitoneal tumor resection, exenteration, cytoreduction surgery, hysterectomy, or radical prostatectomy.

## 15.9 Appendix VII: IMPROVE Trial - Incidence of neurocognitive decline

**Background**

Perioperative stroke is a serious complication that is associated with a significant increase in morbidity and mortality. The incidence of overt stroke after noncardiac surgery lies between 0.14%-0.7%.

A recently published prospective cohort study including 1114 patients undergoing noncardiac surgery showed that the incidence of covert stroke was 7%. Furthermore, covert stroke was also associated with an increased risk of postoperative delirium (hazard ration [HR] 2.24, 95% CI 1.06 – 4.73, absolute risk increase 6%; *p*=0.030) and overt stroke or transient ischemic attack within 1 year (HR 4·13, 1·14–14·99, absolute risk increase 3%; p=0.019). 1-year cognitive decline occurred in 42% of patients, who had a perioperative covert stroke and in 29% of patients who did not have a perioperative covert stroke.1

An analysis of 523,059 patients undergoing noncardiac and nonneurologic surgery showed following independent predictors for stroke: i) age > 6*2* years, ii) history of myocardial infarction within 6 months, iii) dialysis, iv) hypertension, v) history of transient ischemic attack, vi) chronic obstructive pulmonary disease, and vii) current tobacco use. They further showed that perioperative stroke was associated with an 8-fold increase in perioperative mortality within 30 days (95% CI, 4.6 –12.6).2 A further analysis in over 2,020,712 patients having surgery for hip fracture showed that patients with heart failure with preserved ejection fraction have a significantly higher incidence of cardio- and cerebrovascular complications (adjusted odds ratio 1.69; 95% CI, 1.51-1.89).3

A previous study in 34 patients undergoing elective shoulder surgery showed that cerebral oxygen saturation is not only dependent of optimal blood pressure, but also of optimal cardiac output.4 Perioperative strokes after noncardiac surgery are typically ischemic, rather than haemorrhagic. These ischemic strokes can be embolic, thrombotic, or of hemodynamic causes (e.g. hypoperfusion of watershed areas).

Interestingly, several studies showed that a compromised cardiac output is associated with a decrease in cerebral perfusion. Furthermore, it was shown that a low cardiac outcome is associated with neurodegeneration in the long-term.5 Although surgery normally lasts only for a few hours, its changes in blood pressure and cardiac output6, on the neurocognitive function has still to be evaluated.

Therefore, we hypothesize in this sub-study that the administration of levosimendan will result in a higher cardiac output, specifically in the postoperative period and thus might increase cerebral perfusion. Thus, levosimendan might reduce the risk of neurologic decline in high risk patients undergoing noncardiac surgery. As a secondary endpoint we will measure intraoperative and postoperative near-infrared spectroscopy (rSO2) saturations.

**Material and Methods**

**Study aims**

***Primary aim***

*Primary hypothesis*

We hypothesize that the administration of levosimendan will result in a significant increase in cardiac output as compared to the placebo group. This might lead to an improved brain perfusion and finally might reduce the incidence of hemodynamic/hypoperfusion related neuro-cognitive impairment after noncardiac surgery.

*Primary outcome*

Our primary outcome will be defined as the incidence of cognitive dysfunction within 1 year after surgery between both study groups. Cognitive dysfunction will be defined as a decrease of 2 points or more on the Montreal cognitive assessment (MoCA) from preoperative baseline values.

We will assess the MoCA before induction of anesthesia, on the first, second, third and fifth postoperative day. Furthermore, we will assess the MoCA score 30 days and one year after surgery per phone interview. It was shown that a decrease of 2 points or more on the MoCA is associated with cognitive decline based on a formal neuropsychological test battery.7 8

For this substudy we will use the abbreviated version of the MoCA test (telephone MoCA), which was also validated to be assessed via phone.9 10 We will use all MoCA items for the abbreviated version that will not require the use of a pencil and paper or a visual stimulus. The maximum score therefore is 22.9

***Secondary aims***

***Secondary aim 1***

Our secondary outcome 2 will be the incidence of cognitive dysfunction within 30 day after surgery between both study groups. Cognitive dysfunction will be defined as a decrease of 2 points or more on the abbreviated Montreal cognitive assessment (MoCA) from preoperative baseline values.

We will assess the telephone MoCA before induction of anesthesia within 30 days after surgery. It was shown that a decrease of 2 points or more on the MoCA is associated with cognitive decline based on a formal neuropsychological test battery.7 8

***Secondary aim 3***

Tissue oxygen delivery is proportional to the cardiac output. Therefore, we assume that regional oxygen saturation (rSO2) of the blood in the brain will be significantly higher after the administration of levosimendan.

*Secondary outcome 3*

Our secondary outcome will be the difference (rSO2) between both study groups. We will use INVOS® cerebral oximeter for rSO2 measurement.

rSO2 will be measured continuously throughout surgery. Furthermore, we will measure rSO2 at least as long as the study drug will be administered during the postoperative period which will be a maximum of 24 hours after starting the study drug infusion.

We will perform baseline measurements before induction of anesthesia. Measurement will be continued for the time of the study drug infusion.

***Tertiary aims***

*Tertiary outcome*

Postoperative neurocognitive decline might be the result from severe hemodynamic perturbation during surgery. Therefore, we will evaluate the correlation between intraoperative measured rSO2 and the incidence of postoperative neurocognitive decline within 30 days and the correlation of rSO2 and neurocognitive decline within one year after surgery.

**Statistical analysis**

*Primary outcome*

We test the difference of the incidence of cognitive decline (defined as a decrease of 2 points or more on the MoCA test as compared to baseline) between both study groups performing a chi-square test. Additionally, we will perform a Mann-Whitney-U test to compare the decrease in MoCA scores between both study groups.

*Secondary outcome 1*

We test the difference of the incidence of cognitive decline within 30 days after surgery (defined as a decrease of 2 points or more on the MoCA test as compared to baseline) between both study groups performing a chi-square test. Additionally, we will perform a Mann-Whitney-U test to compare the decrease in MoCA score between both study groups.

*Secondary outcome 2*

The difference in time-weighted-average (TWA) rSO2 will be tested using a Mann-Whitney-U test.

*Tertiary outcome*

For the correlation between rSO2 values and postoperative neurocognitive decline we will calculate a Pearson correlation coefficient. Specifically, we will calculate the postoperative maximum decline in MoCA Scores measured on the first, second, third and fifth postoperative days (MoCAdecline) in relation to the preoperative baseline score (MoCAbase) as follows:

pod…postoperative day

We will further calculate the change in intraoperative and postoperative rSO2 values in relation to preoperative baseline rSO2. Therefore, we will calculate the difference of each intra- and postoperative rSO2 value related to preoperative measured rSO2.

**Sample size calculation**

The median MoCA in patients, who are 65 years or older lies at 25 (IQR 21-27).1 Therefore, we assume that patients receiving levosimendan will have a more stable cardiac output in the perioperative setting and thus have no decline in the MoCA. As compared, we assume a MoCA decline of at least 2 points with a standard deviation of 4 (which is defined as significant neurocognitive decline) in patients receiving placebo.

To detect a clinical relevant difference of at least 2 points in MoCA between both study groups, we calculated that at least 70 patients per group are needed to get 80% power with a two-sided Wilcoxon-Rank-Sum test to detect the assumed difference in MoCA at an alpha level of 0.05.

***Outcome definitions***

*Transient ischemic attack (TIA)*

Transient ischemic attack will be defined as a new focal neurological deficit thought to be vascular in origin with signs and symptoms lasting less than 24 hours, as diagnosed by a physician involved in the patient´s care.

*Dementia*

The outcome dementia will be met if a physician will diagnose a patient with dementia.

*Mild cognitive impairment*

The outcome mild cognitive impairment will be met if a physician will diagnose a study patient with mild cognitive impairment.

**References**

1. Mrkobrada M, Chan MTV, Cowan D, et al. Perioperative covert stroke in patients undergoing non-cardiac surgery (NeuroVISION): a prospective cohort study. *Lancet* 2019; **394**: 1022–9

2. Mashour GA, Shanks AM, Kheterpal S. Perioperative stroke and associated mortality after noncardiac, nonneurologic surgery. *Anesthesiology* 2011; **114**: 1289–96

3. Bohsali F, Klimpl D, Baumgartner R, Sieber F, Eid SM. Effect of Heart Failure With Preserved Ejection Fraction on Perioperative Outcomes in Patients Undergoing Hip Fracture Surgery. *J Am Acad Orthop Surg* 2020; **28**: e131–8

4. Soeding PF, Hoy S, Hoy G, Evans M, Royse CF. Effect of phenylephrine on the haemodynamic state and cerebral oxygen saturation during anaesthesia in the upright position. *Br J Anaesth* [Internet] The Author(s); 2013; **111**: 229–34 Available from: http://dx.doi.org/10.1093/bja/aet024

5. Moore EE, Liu D, Bown CW, et al. Lower cardiac output is associated with neurodegeneration among older adults with normal cognition but not mild cognitive impairment. *Brain Imaging Behav* Brain Imaging and Behavior; 2020;

6. Sessler DI, Meyhoff CS, Zimmerman NM, et al. Period-dependent Associations between Hypotension during and for Four Days after Noncardiac Surgery and a Composite of Myocardial Infarction and Death: A Substudy of the POISE-2 Trial. *Anesthesiology* 2018; **128**: 317–27

7. Krishnan K, Rossetti H, Hynan LS, et al. Changes in Montreal Cognitive Assessment Scores Over Time. *Assessment* 2017; **24**: 772–7

8. Tan HH, Xu J, Teoh HL, et al. Decline in changing montreal cognitive assessment (MoCA) scores is associated withpost-stroke cognitive decline determined by a formal neuropsychological evaluation. *PLoS One* 2017; **12**: 3–6

9. Pendlebury ST, Welch SJV, Cuthbertson FC, Mariz J, Mehta Z, Rothwell PM. Telephone assessment of cognition after transient ischemic attack and stroke: Modified telephone interview of cognitive status and telephone montreal cognitive assessment versus face-to-face montreal cognitive assessment and neuropsychological battery. *Stroke* 2013; **44**: 227–9

10. Zietemann V, Kopczak A, Müller C, Wollenweber FA, Dichgans M. Validation of the telephone interview of cognitive status and telephone montreal cognitive assessment against detailed cognitive testing and clinical diagnosis of mild cognitive impairment after stroke. *Stroke* 2017; **48**: 2952–7

**15.10 Appendix VII: Substudy Perioperative Echocardiography**

### Background

Echocardiography is an established tool for evaluating heart function, cardiac morphology, and further to diagnose heart diseases. The heart cycle can be divided into a systolic phase, which starts with the beginning of ventricular muscle contraction and closure of the tricuspid and mitral valves and ends after ejection of part of the filling volume, ventricular muscle relaxation and closure of the pulmonary and aortic valve. Systolic function is evaluated by evaluating the ability of the heart to overcome afterload and eject blood into the systemic circulation. The ability of the heart muscle to relax and allow filling of the ventricles is signified by diastolic function. Diastolic function is important for the overall performance of the heart and thus influences perioperative outcomes.

Two relatively small studies, with an overall patient population of approximately 900 patients, have shown that a preoperative low ejection fraction measured by resting echocardiography was a significant independent predictor for cardiovascular complications within 30 days after surgery.(1)(2) The largest study including 1923 patients undergoing noncardiac surgery have shown that preoperative echocardiographic parameters were significantly associated with postoperative major cardiovascular complications.(3)

Many studies evaluated the association between perioperative administration of Levosimendan and the effect on heart function by using echocardiography.(4)(5)(6)(7)(8) However, only a relatively small number of patients have been enrolled in these studies.(9)(10) Therefore, the effect of a perioperative administration of Levosimendan on cardiac function has been not entirely cleared yet, specifically in patients undergoing non-cardiac surgery. Thus we will evaluate in this sub-study of the IMPROVE trial the effect of a perioperative single-dose administration of levosimendan on postoperative cardiac function in patients at-risk for cardiovascular complications undergoing non-cardiac surgery as compared to placebo. We will evaluate cardiac function by using transthoracic echocardiography.

### Measurements

Systolic function will be evaluated according to left ventricular ejection fraction, using biplane Simpson method, and stroke volume, according to the formula Stroke volume = π*LVOT2/2*LVOT VTI. Diastolic function is evaluated using E/A ratio, E/é, TI velocity, LA volume as well as mitral valve deceleration time as describe in the guidelines. Diastolic dysfunction when observable will also be classified into normal function or dysfunction grades 1-3, according to current guidelines.

Right ventricular function will be estimated by using Tricuspid annular plane systolic excursion (TAPSE), right ventricular S´, and right ventricular fractional area change. Finally, heart chamber sizes and vena cava inferior size and variability will be measured according to the latest guideline published by the American Heart Association (AHA). Measurements will be done in the preoperative phase in the wake room before application of the study medication on postoperative day 1, 3, and 5.

### Statistical Analysis

We will use two-tailed students T-test for comparison of echocardiography baseline parameters. We will use two-tailed paired students T-test and Wilcoxon signed-rank test as appropriate for comparison of study medication related changes to diastolic and systolic function parameters between groups. To further analyze the effect on diastolic function by the study medication we will also use a multivariate linear regression model using study medication and other baseline variables that will show significant effect in univariate linear regression. Change in the primary outcome LVEF (EF/SV) of 25% relative to the control group was used for sample size calculation. Sample size analysis was conducted using G*Power 3.1. with an 80% power and a type I error of 0.05, leading to a necessary sample size of 101 subjects.

### Investigators

Each examination will be carried out by 1 of 3 investigators. The senior investigator is an experienced user of echocardiography with extensive knowledge and multiple certifications (European Association of Cardiovascular Imaging diploma for transthoracic echocardiography / European Diploma in advanced critical care Echocardiography). All investigators have completed echocardiography trainings and have many years of experience with the use of echocardiography in a clinical setting. The two junior investigators will be accompanied by the senior investigator up to a point where examinations have reached a satisfiable degree of competence and can be performed without supervision.

### Location

Echocardiography examinations will only be carried out at the Medical University of Vienna.

### Communication of echocardiography findings

To reduce the risk introducing confounders to the original study protocol and results, echocardiography findings will not be shared with the treating physicians. This procedure only applies to echocardiography done solely for study purposes and not for echocardiography done by the treatment team as part of routine care.

### Primary Aim

Our primary outcome is the effect of Levosimendan on systolic and diastolic function as observed in echocardiography. Systolic ejection fraction, stroke volume and diastolic function grade respectively will function as markers for systolic and diastolic function. Measurements will be taken preoperatively and on postoperative day 1, 3 and 5.

### Secondary Aim I

Our secondary outcome will be the change in heart chamber sizes pre- and postoperatively, with and without Levosimendan.

### Risk & Benefit

There is no inherent risk involved for the patients with the addition echocardiography to the study.

### Abbreviations

E/A Early to late diastolic transmitral flow velocity

E/é E (see above) to early diastolic mitral annular tissue velocity

EF Ejection fraction

LVOT Left ventricular outflow tract

TI Tricuspid insufficiency

VTI Velocity time integral

SV Stroke volume

### References

1. Rohde LE, Polanczyk CA, Goldman L, Cook EF, Lee RT, Lee TH. Usefulness of transthoracic echocardiography as a tool for risk stratification of patients undergoing major noncardiac surgery. Am J Cardiol. 1. März 2001;87(5):505–9.

2. Halm EA, Browner WS, Tubau JF, Tateo IM, Mangano DT. Echocardiography for assessing cardiac risk in patients having noncardiac surgery. Study of Perioperative Ischemia Research Group. Ann Intern Med. 15. September 1996;125(6):433–41.

3. Park S-J, Choi J-H, Cho S-J, Chang S-A, Choi J-O, Lee S-C, u. a. Comparison of transthoracic echocardiography with N-terminal pro-brain natriuretic Peptide as a tool for risk stratification of patients undergoing major noncardiac surgery. Korean Circ J. September 2011;41(9):505–11.

4. Fredholm M, Jorgensen K, Houltz E, Ricksten SE. Inotropic and lusitropic effects of levosimendan and milrinone assessed by strain echocardiography-A randomised trial. Acta Anaesthesiol Scand. 2018/06/22 Aufl. Oktober 2018;62(9):1246–54.

5. Mishra A, Kumar B, Dutta V, Arya VK, Mishra AK. Comparative Effect of Levosimendan and Milrinone in Cardiac Surgery Patients With Pulmonary Hypertension and Left Ventricular Dysfunction. J Cardiothorac Vasc Anesth. 2016/06/21 Aufl. Juni 2016;30(3):639–46.

6. Salgado Filho MF, Barral M, Barrucand L, Cavalcanti IL, Vercosa N. A Randomized Blinded Study of the Left Ventricular Myocardial Performance Index Comparing Epinephrine to Levosimendan following Cardiopulmonary Bypass. PLoS One. 2015/12/15 Aufl. 2015;10(12):e0143315.

7. Anastasiadis K, Antonitsis P, Vranis K, Kleontas A, Asteriou C, Grosomanidis V, u. a. Effectiveness of prophylactic levosimendan in patients with impaired left ventricular function undergoing coronary artery bypass grafting: a randomized pilot study. Interact Cardiovasc Thorac Surg. 2016/07/06 Aufl. November 2016;23(5):740–7.

8. Malik V, Subramanian A, Hote M, Kiran U. Effect of Levosimendan on Diastolic Function in Patients Undergoing Coronary Artery Bypass Grafting: A Comparative Study. J Cardiovasc Pharmacol. 2015/04/29 Aufl. August 2015;66(2):141–7.

9. Katsaragakis S, Kapralou A, Markogiannakis H, Kofinas G, Theodoraki EM, Larentzakis A, u. a. Preoperative levosimendan in heart failure patients undergoing noncardiac surgery. Neth J Med. 2008/04/22 Aufl. April 2008;66(4):154–9.

10. Katsaragakis S, Kapralou A, Drimousis P, Markogiannakis H, Larentzakis A, Kofinas G, u. a. Prophylactic preoperative levosimendan administration in heart failure patients undergoing elective non-cardiac surgery: a preliminary report. Hellenic J Cardiol. 2009/05/26 Aufl. Mai 2009;50(3):185–92.
